1  
2  
3  
4  
5  
6  
7  
8  
9  
10  
11  
12  
13  
14  
15  
16  
17  
18  
19  
20  
21  
22  
23  
24  
25  
26  
27

**Joint development recovery on resumption of embryonic movement following paralysis**

**Authors**

Rebecca A. Rolfe<sup>1</sup>, David Scanlon O’Callaghan<sup>1</sup>, Paula Murphy<sup>1</sup>

**Authors affiliations**

<sup>1</sup> Department of Zoology, School of Natural Sciences, University of Dublin, Trinity College  
Dublin, Ireland.

In Submission to: Disease Models and Mechanisms

**Keywords:** Immobilisation, Skeletal development, Joint, Recovery, Cartilage, embryonic  
movement

**Summary Statement**

The study reveals that embryonic movement post paralysis can partially-recover specific aspects of joint development, which could inform therapeutic approaches to ameliorate the effects of restricted fetal movement *in utero*.

28 **Abstract**

29 Fetal activity *in utero* is a normal part of pregnancy and reduced or absent movement can lead  
30 to long-term skeletal defects such as Fetal Akinesia Deformation Sequence (FADS), joint  
31 dysplasia and arthrogyriposis. A variety of animal models with decreased or absent embryonic  
32 movements show a consistent set of developmental defects providing insight into the aetiology  
33 of congenital skeletal abnormalities. At developing joints defects include reduced joint  
34 interzones with frequent fusion of cartilaginous skeletal rudiments across the joint. At the spine  
35 defects include shortening and a spectrum of curvature deformations. An important question,  
36 with relevance to possible therapeutic interventions for human conditions, is the capacity for  
37 recovery with resumption of movement following short term immobilisation. Here we use the  
38 well-established chick model to compare the effects of sustained immobilisation from  
39 embryonic day (E) 4-10 to two different recovery scenarios: (i) natural recovery from E6 until  
40 E10 and (ii) the addition of hyperactive movement stimulation during the recovery period. We  
41 demonstrate partial recovery of movement and partial recovery of joint development under  
42 both recovery conditions, but no improvement in spine defects. The joints examined (elbow,  
43 hip and knee) showed better recovery in hindlimb than forelimb, with hyperactive mobility  
44 leading to greater recovery in the knee and hip. The hip joint showed the best recovery with  
45 improved rudiment separation, tissue organisation and commencement of cavitation. This work  
46 demonstrates that movement post paralysis can partially-recover specific aspects of joint  
47 development which could inform therapeutic approaches to ameliorate the effects of human  
48 fetal immobility.

49

50

51

52

53

54

55

56

57

58

59

60

61

## 62 **Introduction**

63 Reduced Fetal Movement (RFM) is a common clinical presentation in obstetric practice, with  
64 22-25% of women perceiving decreased fetal movement resulting in poor perinatal outcomes  
65 (reviewed in Lai et al., 2016; Dutton et al., 2012). RFM *in utero* is associated with a number  
66 of conditions and syndromes including Fetal Akinesia Deformation Sequence (FADS) which  
67 represents a spectrum of defects in bone and joint formation including hypomineralised, brittle  
68 bones prone to fracture (Temporary Brittle Bone Disease), and contracture of joints (reviewed  
69 in Shea et al., 2015); joint dysplasia, particularly of the hip (reviewed in Nowlan, 2015); and  
70 arthrogyposis, defined as multiple joint contractures, affecting approximately 1 in 3000 live  
71 births (Skaria et al., 2019; Hall, 2014). Effects of RFM are variable and can range from mild  
72 to severe depending on the developmental window in which movement is interrupted (Filges  
73 et al., 2019). Short term absence of fetal movements at approximately 8 weeks of gestation,  
74 lasting over 3 weeks, has been theorised to be sufficient to result in the clinical features of  
75 arthrogyposis (Kowalczyk and Felus, 2016). The multiple contractures in arm and leg joints  
76 that result are associated with an increase in connective tissue around the immobilised joints,  
77 curvature abnormalities of the spine including kyphosis and scoliosis and disuse wastage of the  
78 muscles that mobilise joints (Ma and Yu, 2017; Hall, 2014). In most cases the reasons behind  
79 reduced fetal movement are unknown but the use of patient specific case studies of rare  
80 movement disorders (e.g. Prader-Willi syndrome), in combination with retrospective studies,  
81 further highlight the causative relationship between diminished fetal movements and skeletal  
82 anomalies (Donker et al., 2009; Bigi et al., 2008; Fong and De Vries, 2003; Moessinger, 1983).

83  
84 The use of animal models has allowed direct investigation of the impact of reduced movement  
85 on skeletogenesis and has established that mechanical forces produced by embryonic  
86 movements are crucial for normal skeletal development (reviewed in (Rolfe et al., 2018;  
87 Felsenthal and Zelzer, 2017; Shea et al., 2015; Nowlan et al., 2010b)). Animal immobilisation  
88 models include pharmacological paralysis of muscle (in chick and zebrafish models), and  
89 genetic lesions that result in muscle absence or immobile muscle (in mouse and zebrafish  
90 models). Immobility results in specific effects on synovial joints, including reduction of the  
91 interzone region between adjacent skeletal rudiments, with continuity of cartilaginous  
92 rudiments across joints (fusion) in many cases; loss of normal cellular organisation with  
93 absence of the chondrogenous layers at the ends of rudiments (zones of future articular cartilage  
94 marked by increased cell density oriented parallel to the joint line); and failure to commence  
95 cavitation (Singh et al., 2018; Nowlan et al., 2014; Roddy et al., 2011b; Nowlan et al., 2010a;

96 Kahn et al., 2009; Osborne et al., 2002). Changes within the rudiment termini also result in  
97 abnormal joint shape (Sotiriou et al., 2019; Brunt et al., 2016; Brunt et al., 2015; Roddy et al.,  
98 2011b) and all of these changes have been shown to be underpinned by altered gene expression  
99 and activation of signalling pathways that guide essential developmental steps including Wnt,  
100 BMP and Hippo (Shea et al., 2019; Rolfe et al., 2018; Singh et al., 2018; Brunt et al., 2017;  
101 Rolfe et al., 2014; Roddy et al., 2011b; Kahn et al., 2009). Disturbances of the spine due to  
102 immobility include curvature abnormalities, posterior and anterior vertebral fusions and altered  
103 vertebral shape (Levillain et al., 2019; Rolfe et al., 2017; Hosseini and Hogg, 1991). In clinical  
104 conditions and experimental animal models, the timing of initiation and duration of  
105 immobilisation is critical for the phenotypic abnormalities that result.

106

107 The development of both the axial and appendicular skeletons is sensitive to immobilisation in  
108 animal models from very early stages, from as early as embryonic day (E) 3 in the chick  
109 (Bridglal et al., 2020; Rolfe et al., 2017; Roddy et al., 2011b). A number of studies have  
110 monitored movement of the chick embryo through developmental time reporting amniotic and  
111 embryonic movements from as early as E3, however independent limb movements were not  
112 reported to take place until E5 or E6 (Wu et al., 2001; Oppenheim, 1975; Hamburger and  
113 Balaban, 1963). Given the clear effects of immobilisation on limb bone and joint development  
114 at time points prior to reported movement, here we address this apparent conundrum by looking  
115 specifically at the possibility of limb movements between E4 and E6.

116

117 While we know that short term embryonic immobility results in skeletal abnormalities, little is  
118 known about the capacity for the system to recover if movement resumes following short term  
119 immobilisation. There are indications that some aspects of the system can, at least partially,  
120 recover. Infants with Temporary Brittle Bone Disease (TBBB) can recover bone strength by  
121 normal mechanical stimuli in the first year of life. Joint shape abnormalities in infants are  
122 shown to be somewhat plastic, for example if congenital developmental dysplasia of the hip is  
123 identified early, joint shape can be 'reset; by harnesses (reviewed in Vaquero-Picado et al.,  
124 2019). A recent study used physical external manipulation of hip joints in immobilised chick  
125 embryos, and showed more normal joint morphogenesis compared to unmanipulated  
126 contralateral limbs (Bridglal et al., 2020). This important question has implications for the  
127 long-term potential for recovery in conditions caused by fetal immobilisation and the potential  
128 development of therapies, either *in utero* or post-natal, to ameliorate the effects of restricted  
129 movement.

130

131 Here we use the chick model to investigate the effects of resumption of movement post  
132 paralysis and the potential to recover from skeletal abnormalities caused by short term  
133 immobilisation in a variety of limb joints and the spine. We compare two potential recovery  
134 scenarios; 1) where embryos are left to recover naturally following short term rigid paralysis  
135 through administration of the widely used neuro-muscular blocking agent 0.5%  
136 Decamethonium Bromide (DMB) and 2) where paralysis is followed by treatment with 0.2%  
137 4-aminopyridine (4-AP), known to cause hyperactivity and increases fetal movement (Pollard  
138 et al., 2016; Pitsillides, 2006). We assess movement in the embryo following the recovery  
139 period under both scenarios. While it is difficult to separate the effect of the short term duration  
140 of the immobilisation from potential amelioration due to a recovery period, the comparison of  
141 natural recovery and stimulation of hyperactive movement with 4-AP provides the opportunity  
142 to investigate response to different levels of resumed movement. We show that embryonic  
143 mobility partially resumes following a period of short-term immobilisation, both naturally and  
144 following hyperactive drug treatment, and, while partial recovery from immobilisation  
145 abnormalities is achieved in limb joints it is not achieved in the spine. Within limb joints there  
146 is greater recovery in the hindlimb than forelimb, especially following hyperactive movement  
147 induction. Findings from this study suggest that movement stimulation can ameliorate the  
148 effects of paralysis on joint development.

149

## 150 **Results**

### 151 **Limb displacement occurs from stage HH23 (E4)**

152 Given that immobilisation from E3-6 has strong effects on limb joint development, while limb  
153 movement has been reported to commence only at E6 (Wu et al., 2001; Hamburger and  
154 Balaban, 1963) we further examined embryo movement specifically between E3 and E6. We  
155 utilised video recording and frame-by-frame image analysis to assess movement events and  
156 record any limb displacement, precisely staging each embryo (Table 1). No embryo movement  
157 was recorded in any specimens observed at E3. The first body movements were recorded at  
158 E4, precisely at stage HH22 when 8/11 embryos observed showed bending of the embryo trunk,  
159 most usually in the sagittal plane, with a steady increase in movement events over subsequent  
160 stages until all embryos were motile within the 2-minute video timeframe by HH24. Limb  
161 movement was assessed by relative displacement of the limb, comparing across video stills  
162 (Table 1, column 5). Outline drawings across a movement event (1-2 seconds apart) were  
163 overlaid at the dorsal aorta and aortic arch to reveal the relative displacement of the forelimb.

164 Clear and distinct limb displacement relative to surrounding landmarks (aorta, eye and dorsal  
165 surface of the embryo) was recorded from as early as HH23 (8/11 cases) and in all specimens  
166 from HH24. It is unclear if such movements are solely passive, caused by the bending of the  
167 trunk, or have any contribution from spontaneous contraction of forming limb muscle masses  
168 at the latter stages (myotubes are first detected at HH25 (Kardon, 1998)). From HH27 (at E6)  
169 limb movements become larger and more obviously independent, corresponding to earlier  
170 observations (Wu et al., 2001; Hamburger and Balaban, 1963).

171

172 **Embryonic movement partially resumes following a period of short-term**  
173 **immobilisation, both naturally and following hyperactivity drug treatment**

174 The effects of immobilisation by rigid paralysis using the neuromuscular blocking agent DMB  
175 on skeletal development have been previously documented across various treatment periods  
176 including detailed analysis of the effects on knee joint development with treatment between  
177 E4.5 and E7 (Roddy et al., 2011b), on hip development over a series of treatment times and  
178 durations with early immobilisation from E4 for 3 days being most disruptive (Bridglal et al.,  
179 2020; Nowlan et al., 2014) and effects on spinal development with treatments from E3 to E9  
180 (Levillain et al., 2019; Rolfe et al., 2017). Here we examine the capacity for recovery from  
181 effects at multiple joints and the spine following early immobilisation between E4 and E6  
182 analysed at E10. To definitively establish sensitivity to immobilisation across the time frame  
183 used in the recovery experiment, we first carried out a preliminary experiment where embryos  
184 received daily treatments either from E4-E6 (early), harvested at E7, or from E7-E9, harvested  
185 at E10 (Fig 1A). Both early and later treatment regimens resulted in abnormal joints compared  
186 with control embryos (mock treated) (Fig. 1B), as well as other typical effects previously  
187 described such as altered spinal curvature, rudiment length reduction and joint contracture  
188 (data not shown) (Rolfe et al., 2017; Nowlan et al., 2008). Whereas control treated specimens,  
189 staged as HH30 (E7) show clear separation of cartilaginous rudiments (Fig. 1Ba and d),  
190 immobilisation from E4 to E6, assessed at E7 (stage verified as HH30) show dramatic reduction  
191 in rudiment separation at both knee (Fig 1Bb and c) and hip joints (Fig 1Bd and f). Following  
192 later (E7 to E9) immobilisation, assessed at E10/ staged to HH36, there is also a clear reduction  
193 in the joint interzone and the separation of rudiments across the joint (Fig.1 Bh-i, Bk-l) and  
194 additionally, while signs of the commencement of cavitation are evident in control specimens  
195 at HH36, there is no sign of cavitation commencing in either knee or hip joints following  
196 immobilisation in specimens at the same stage (Fig. 1 Bg-l; yellow arrow in controls). This

197 preliminary study established that even short, early immobilisation from E4 to E6 results in  
198 disturbance of development similar to more sustained immobilisation, as previously described.

199

200 To assess if movement resumes following an initial period of DMB administration (0.5% DMB  
201 from E4 to E6), followed by either a period of natural recovery or hyperactivity stimulation  
202 (0.2% 4-aminopyridine (4-AP) daily, E7-E9) (Fig. 2A), each embryo from each of the  
203 treatment groups was observed and movement recorded over a 60 second period on E10, prior  
204 to harvest (Fig. 2B). The four-point classification system established here to score extent of  
205 movement *in ovo*, found that all embryos in the control group (n= 23) showed extensive  
206 movement with all but one embryo scored as having large body and limb bending movements  
207 at E10 (Fig. 2B). 64% of embryos subjected to sustained immobilisation from E4 to E9 (n= 14)  
208 (i.e. no recovery period) showed no movement (score of 0), two embryos had a score of one  
209 (minor body sway) and two a score of two (additional small limb movements), with only one  
210 embryo showing more extensive movement.

211

212 Both recovery groups showed increased movement in the post-immobilisation period  
213 compared to sustained immobilisation ( $p < 0.01$ ), with the majority in both groups having the  
214 highest movement scores of two or three, but were significantly less active than control  
215 embryos ( $p < 0.05$ ). All embryos in the immobilisation followed by natural recovery group (Im  
216 + NR) showed some movement (79% scoring 2 (small limb movements) or 3 (large body and  
217 limb bending movements) (Fig. 2B) (n=14)). The recovery group where 0.2% aminopyridine  
218 was administered to stimulate movement displayed the greatest range of movement  
219 classifications and again with the majority scoring in categories two or three (Fig. 2B) (n=25).  
220 Overall, movement was significantly recovered following short periods of immobilisation, in  
221 both recovery groups, compared to sustained immobilisation although the extent of resumed  
222 movement was significantly less than in control embryos. There were no significant differences  
223 in movement scores between natural recovery or hyperactive stimulation ( $p = 0.289$ ) assessed  
224 in this way.

225

226 Joint contractures are a common feature of rigid paralysis induced by DMB treatment so we  
227 assessed joint angle at elbow, knee and hip joints across the groups as an indirect indication of  
228 recovery from rigid paralysis following short term immobilisation. Comparing sustained  
229 immobilisation for 6 days to control showed abnormal flexion of all joints (Fig. 2C (red lines  
230 compared to black lines) as expected. Elbow joint angle for both recovery groups and sustained



231 immobilisation was significantly more flexed than controls, ( $p \leq 0.001$ ) (Fig. 2C-D, Table 2). In  
232 all immobilisation groups there is a large range of elbow joint angles observed (Fig. 2C-D)  
233 with the largest range for the immobilisation plus hyperactive movement group totalling in  
234 excess of 80 degrees (Fig. 2C (blue segment) and D (blue dots)). This group also showed the  
235 greatest variation in extent and types of movements observed (Fig. 2B). For the knee joint,  
236 sustained immobilisation also resulted in more flexed knee joints ( $p = 0.012$ , Fig. 2C-D, Table  
237 2) while knee joint angles following natural recovery (Im +NR) were not significantly different  
238 from the control group ( $p = 0.066$ ) (Fig. 2C green line in knee joint). The immobilisation with  
239 hyperactivity treatment group (Im + HM) on the other hand, were significantly flexed  
240 compared to controls ( $p < 0.001$ , Fig. 2C-D), again with a large range in the data for recovery  
241 groups. Analysis of the hip joint (femur and ilium (posterior)) showed less variance in all  
242 groups and only hip angles under sustained immobilisation were significantly more acute than  
243 control joints (Fig. 2C-D). Hip joint angles were most similar to control when short-term  
244 immobilisation was followed by hyperactivity treatment (Fig. 2C-D, Table 2).

245

246 In summary, joint angle analysis corroborates the movement scores in indicating partial  
247 recovery of normal joint position following short term immobilisation. The effect was variable  
248 across joints with the greatest effect on restoration of normal hip joint angles under both  
249 recovery regimens; natural recovery resulting in more normal knee joint angles and the elbow  
250 joint remained most abnormally flexed and most similar to the situation under sustained  
251 immobilisation under both recovery scenarios.

252

### 253 **Effect of paralysis and recovery on skeletal development:**

#### 254 **i) Joint development**

255 Abnormalities in chick knee and hip joint development following rigid paralysis have been  
256 well documented (Nowlan et al., 2014; Roddy et al., 2011b) while abnormalities at the elbow  
257 joint have also been noted (Roddy et al., 2011b) but not previously characterised in detail. Here  
258 we examine if a post paralysis recovery period can reduce or recover abnormalities observed  
259 under sustained immobilisation at the elbow, hip and knee. All groups were assessed at E10  
260 (all verified at stage HH36), when early signs of cavitation are normally evident (Roddy et al.,  
261 2009). Using histological analysis of full series of sections through the joints of replicate  
262 specimens in each treatment category we assessed the elbow, knee and hip joint for evidence  
263 of recovery in three specific abnormalities caused by immobilisation; 1) reduced separation of  
264 the rudiments (reduced interzone) with partial fusion of cartilaginous rudiments at the joint in



265 most cases (scored as presence or absence of joint fusion); 2) absence of distinguishable  
266 chondrogenous cell layers at the rudiment termini (altered tissue patterning) and 3) lack of  
267 initiation of cavitation indicated by the absence of a tissue free region within the joint.

268

269 Table 3 summarises the data across all joints while Figure 3 presents representative histological  
270 sections. Since the elbow joint consists of two sites of articulation, with the radius and ulna  
271 distal to the humerus, analysis of both the humeroradial (HRD) and humeroulnar (HUL) joints  
272 was performed separately (Table 3). All control joints at this stage displayed clear separation  
273 of the rudiments (Fig. 3, left hand column, red brackets) and characteristic tissue organisation  
274 at the joint interface and interzone; in particular the typical organisation of the chondrogenous  
275 layers (site of future articular cartilage) at the rudiment termini, evident as areas of increased  
276 cell density with orientation of cells parallel to the joint interface (Fig. 3, left hand column;  
277 yellow brackets). Early signs of cavitation are clear in all control joints as localised regions of  
278 tissue clearance (Fig. 3Aii, Bii, Cii, black arrows).

279

280 Elbow joint: Following sustained immobilisation typical cellular organisation at the elbow joint  
281 is lost, similar to other limb joints, including separation between rudiments with rudiment  
282 fusion in 8/8 specimens analysed at the HRD interface, while fusion was observed in 56% (5/9)  
283 at the HUL (Fig. 3Ai, Table 3), suggesting a stronger effect of immobilisation on the HRD  
284 compared to the HUL at the elbow. This altered separation of the rudiments in immobilised  
285 joints is accompanied by absence of the clear organisation of cells within chondrogenous layers  
286 (0/8 and 0/9 at the HRD and HUL respectively under sustained immobilisation (Fig. 3Aiii).  
287 Complete absence of commencement of cavitation was also observed in both articulations of  
288 the elbow (0/8; Fig. 3Aii). With early immobilisation followed by a recovery period, rudiment  
289 fusion was evident at the elbow joint but in a lower proportion of specimens; 6/12 and 10/11  
290 at the HRD; 3/12 and 2/11 at the HUL following normal recovery (Im +NR) and hyperactive  
291 movement (Im + HM) respectively (Table 3) with the humeroulnar joint again being impacted  
292 less (Fig. 3Ai, Table 3).

293

294 The presence of chondrogenous layers at rudiment termini also showed an indication of partial  
295 recovery with distinct chondrogenous layers in 2/12 HRD and 4/12 HUL joints with natural  
296 recovery (Fig. 3Aiii, yellow dotted lines indicating cellular territory), and 1/11 HRD and 2/11  
297 HUL joints following recovery with hyperactive movement induction. However, neither  
298 recovery group reached a level of significant difference from sustained immobilisation in this

299 respect. Despite improvement in rudiment separation and the presence of chondrogenous layers  
300 in some specimens following recovery periods however, there was no evidence of  
301 commencement of cavitation in either recovery group at this stage (Fig. 3Aii, Table 3).

302

303 Knee joint: Within the knee joint, there was 88% incidence of fusion between the medial  
304 femoral condyle and the tibiotarsus under sustained immobilisation and this was reduced with  
305 movement resumption; 64% (7/11) with natural movement and only 12.5% (1/8) with  
306 hyperactive movement where hyperactive movement recovery is statistically different to  
307 sustained immobilisation and is not different to the control situation (Fig. 3Bi, Table 3). In all  
308 joints immobilised for a sustained period there was complete absence of chondrogenous layers  
309 (0/8) and no evidence of commencement of cavitation (0/8) (Fig. 3Bii-iii). Resumption of  
310 movement resulted in the presence of chondrogenous layers in 4 specimens, 2/11 (18%) with  
311 natural recovery and 2/8 (25%) with induced hyperactive movement (Fig. Biii, Table 3).  
312 However, neither resumption of movement condition resulted in commencement of cavitation  
313 within this timeframe.

314

315 Hip joint: Analysis of the hip joint (articulation between the ilium and the femoral head)  
316 showed the best recovery with movement resumption. While again complete rudiment fusion,  
317 absence of chondrogenous layers and no evidence of commencement of cavitation were  
318 observed in all specimens with sustained immobilisation (Fig. 3C, Table 3), with movement  
319 resumption rudiment separation was observed in 29% of cases with natural movement and  
320 87.5% with hyperactive movement (Fig. 3Ci, Table 3). While there was no apparent  
321 improvement in cellular organisation seen through the appearance of chondrogenous layers  
322 following natural movement resumption post paralysis, 62.5% (5/8) of cases showed  
323 recognisable chondrogenous layers following induction of hyperactivity post paralysis, highly  
324 statistically significant (Fig. 3Ciii, yellow dotted lines indicating region, Table 3). Unlike the  
325 other joints analysed, evidence of commencement of cavitation at this stage was observed in  
326 both movement resumption groups, 14% (1/7) with natural movement and 37.5% (3/8) with  
327 hyperactive movement (Fig. 3Cii, black arrow).

328

329 Taken together the data suggests that resumption of movement following short-term  
330 immobilisation can partly rescue the effects on joint development seen with sustained absence  
331 of movement, with greater recovery in the hindlimb than forelimb joints and generally greater  
332 recovery with hyperactive movement compared to natural resumption. Evidence of rudiment

333 separation was observed in both hindlimb joints (knee and hip), with a greater incidence in the  
334 group stimulated for hyperactive movement post paralysis. The only immobilised joint to show  
335 evidence of commencement of cavitation at this stage following short-term immobilisation and  
336 a recovery period was the hip joint, while evidence of recovery of chondrogenous layer cellular  
337 organisation was seen in a proportion of specimens at all joints. At the elbow, the humeroulnar  
338 joint was slightly less impacted by sustained immobilisation and showed greater capacity for  
339 recovery than the humeroradial joint.

340

341 To corroborate the findings at limb joints, we examined another aspect of limb skeletogenesis  
342 previously shown to be sensitive to the loss of movement; skeletal rudiment length, measuring  
343 the length of the femur and the humerus across treatment groups (Fig. S1). While both  
344 rudiments showed significant reduction in length under sustained immobilisation, both again  
345 showed indications of partial recovery following resumption of movement. The femur showed  
346 no significant difference in length between control and immobilisation followed by hyperactive  
347 stimulation, while there was evidence of a trend with an increase in mean length in the humerus  
348 when immobilisation was followed by stimulation of hyperactivity, and while still significantly  
349 shorter than controls, a reduction in the significance level, compared to sustained  
350 immobilisation (Fig. S1, A, B, blue bars).

351

## 352 ii) **The spine.**

353 All groups of immobilised spines, including short-term immobilisation followed by a recovery  
354 period, with or without hyperactivity stimulation, were shorter than controls ( $p < 0.001$  in each  
355 comparison, Fig. 4A) with no differences in curved length between immobilised groups,  
356 sustained, natural recovery or hyperactive movement (Fig. 4A). Curvature deformities  
357 observed in the sagittal plane include hyperkyphosis and hyperlordosis, while abnormalities  
358 observed in the coronal plane are scoliosis (Fig. 5A schematic representations). Observed  
359 curvature abnormalities and associated reductions in spine length are seen in sagittal curvature  
360 outlines for each movement group (Fig. 4B).

361

362 In all immobilisation regimens, there were 146 individual spinal deformities observed in 66  
363 immobilised spines. Sustained immobilisation (E4-E10) for 6 days resulted in a total of 52  
364 individual curvature deformities observed in 24 spines, with an average of  $2.26 \pm 0.22$  (SEM)  
365 deformities per spine (Fig. 5B, red bar), while 59 individual defects in 22 spines were observed  
366 with natural recovery (NR) (an average of  $2.68 \pm 0.35$  per spine, Fig. 5B, green bar) and 35 in

367 20 spines (an average of  $1.75 \pm 0.26$ ) (Fig. 5B, blue bar) with hyperactive movement. There  
368 was no difference in the average number of defects per spine across immobilisation groups  
369 (Fig. 5B). Sustained immobilisation resulted in significantly more kyphotic and lordotic defects  
370 than scoliotic defects ( $p < 0.001$ , Fig. 4C), totalling 21 incidences of hyperkyphosis, 28  
371 incidences of hyperlordosis and 3 scoliotic bends, with natural recovery showing similar  
372 incidences and differences between defect type. Hyperactive movement resulted in  
373 significantly more lordotic defects than kyphotic and scoliotic (Fig. 4C). Combining the data,  
374 the most common abnormality was hyperlordosis at 55.5%, then hyperkyphosis at 37% and  
375 scoliosis was 7.5%, across all immobilisation regimens with and without a recovery period.  
376 Independent of immobilisation regimen, there were significantly more lordotic than kyphotic  
377 defects ( $p < 0.045$ ) or scoliotic ( $p < 0.001$ ) (Fig. 5C, data combined). The low incidence in  
378 scoliotic defects or abnormal curvatures in the coronal plane (11 incidences in 146) corresponds  
379 to previous observations following chick immobilisation (Rolfe et al 2017).

380

381 The cervical, lumbar and sacral anatomical regions were equally affected with regards to the  
382 total number of deformities observed with sustained immobilisation (15, 17 and 16  
383 respectively), while the thoracic region was significantly less affected than other anatomical  
384 regions (Fig. 5D). The thoracic region was similarly significantly less affected than the lumbar  
385 and sacral regions with hyperactivity recovery (Fig. 5D) while no site-specific differences were  
386 recorded in the natural recovery group. Combining all immobilisation groups with or without  
387 a recovery period there were significantly more deformities in the lumbar and cervical  
388 anatomical regions, compared to the thoracic region, ( $p < 0.004$ ,  $p < 0.016$ , respectively (2-way  
389 ANOVA)) (Fig. 5D).

390

391 Comparison of the recovery regimens reveals few differences except less defects in the thoracic  
392 region with hyperactive recovery of movement compared to natural recovery of movement  
393 ( $p = 0.024$  Fig. 5D, black bar).

394

## 395 **Discussion**

396 This study advances our understanding of the plasticity of skeletal deformities caused by  
397 reduced embryonic movement by investigating the effects of resumption of movement post  
398 paralysis. It shows that movement resumption following rigid paralysis during early phases of  
399 skeletal development (from E4-E6) is only partially achieved, even with hyperactivity  
400 treatment, and this corresponds to partial recovery in some of the skeletal developmental

401 defects caused by reduced movement. Recovery is seen in aspects of limb joint development  
402 but not in spinal defects. Within limb joints there is better recover in hindlimbs (hip and knee)  
403 compared to forelimbs (elbow), and overall better recovery with induction of hyperactive  
404 movement compared to natural resumption of movement. The hip joint showed the best  
405 recovery and closest to normal developmental progression post-paralysis. Overall, this  
406 demonstrates a degree of plasticity in terms of the dependency of normal joint development on  
407 embryonic movement and shows the potential for therapeutic intervention to improve outcomes  
408 in clinical joint abnormalities caused by reduced fetal movement such as in arthrogryposis and  
409 joint dysplasia.

410

411 Additionally, the study improves the chick immobilisation model as an experimental system to  
412 investigate the impact of reduced movement on development by refining knowledge on the  
413 commencement of movements in the embryo. Early studies by Hamburger and Balaban (1963)  
414 described commencement of body movement as early as E3.5 but they did not observe  
415 independent limb movements until E6.5. This 1963 study, often cited in the literature, creates  
416 a difficulty in understanding how immobilisation prior to E6 could have such strong impact on  
417 limb skeletal development, particularly on joint patterning (Fig 1). Subsequent studies have  
418 reported limb movement from E5 (Oppenheim, 1975) or E6 (Wu et al., 2001). We resolve this  
419 apparent conundrum by re-examining early embryo movements using video frame by frame  
420 analysis, combined with precise staging of embryos, establishing that distinct limb  
421 displacement occurs from HH23 (E4). While it is unclear if such movements are entirely  
422 passive, resulting from body movements propelled by spontaneous contraction of trunk  
423 muscles (Wu et al., 2001), or may have some contribution from spontaneous contraction of  
424 forming limb myotubes, detectable from HH25 (Kardon, 1998), they create a biophysical  
425 environment that could influence skeletal development, that would be altered in immobile  
426 specimens.

427

428 Skeletal abnormalities in infants caused by reduced fetal movement *in utero* are to some degree  
429 plastic, and therefore amenable to improvement by targeted therapeutics (reviewed in Vaquero-  
430 Picado et al., 2019; Miller and Hangartner, 1999). Directly investigating this important  
431 question of plasticity in animal immobilisation models is challenging, in particular the capacity  
432 for recovery following resumption of movement due to the difficulty of separating the effects  
433 of altered timing and duration of immobilisation and any recovery achieved following  
434 resumption of movement. To overcome this we compared two recovery scenarios, where

435 embryos are allowed to recover naturally following short term rigid paralysis or where paralysis  
436 is followed by treatment with 0.2% 4-AP to increase fetal movement (Pollard et al., 2017). This  
437 level of 4-AP treatment is shown to result in an increase in frequency of movement by up to  
438 175% (Pollard et al., 2016; Pitsillides, 2006) and to impact muscle structure, bone growth  
439 (Heywood et al., 2005) and tendon mechanical properties (Pan et al., 2018). Therefore, the  
440 effects of short-term immobilisation followed by a natural recovery period is not only  
441 compared to sustained immobilisation, but also to a recovery period with hyperactive  
442 movement. The finding that hyperactive mobility during the recovery period resulted in  
443 significantly greater recovery than the natural resumption of movement demonstrates that  
444 recovery is achieved, albeit partial. The achievement of recovery is also supported by the  
445 demonstration of the effects of the short-term period of immobilisation alone (E4-E6) which  
446 causes similar defects to sustained immobilisation with reduction of the knee and hip joint  
447 interzone (Fig 1). This same early period of immobilisation is also reported to have most severe  
448 effects on hip development (Bridglal et al., 2020). The recovery recorded here was variable  
449 across different aspects of skeletal defect analysed, as well as between natural resumption of  
450 movement and hyperactive movement, providing important insight into the potential and  
451 dynamics for recovery.

452  
453 A further important aspect of the experimental design is the use of a simple movement scoring  
454 system to verify and assess movement in each of the experimental groups on the day of harvest,  
455 showing that movement does indeed resume following termination of immobilisation drug  
456 treatment, under both recovery regimens. Strikingly however movement does not return to  
457 levels seen in control embryos. One possibility explanation is that the developmental impact  
458 during the period of paralysis, including very severe alteration to tissue patterning, especially  
459 reduction in the interzone with partial cartilage fusion across the joint, may physically hinder  
460 free movement. Using this scoring system, movement following natural resumption and  
461 administration of the hyperactivity drug was not differentiated but this may be due to limited  
462 assessment; while movement event and type within a 60 second timeframe were recorded,  
463 movement duration or frequency was not assessed. Video recording and analysis, similar to  
464 that used here to record normal movements, would permit a more refined analysis but this  
465 would have delayed the harvesting and fixation of specimens, potentially affecting survival and  
466 compromising analysis and comparison of stage matched specimens. In combination with the  
467 movement classification scoring approach, we assessed joint angle as an indirect indication of  
468 movement resumption. Sustained immobilisation resulted in abnormal flexion of all joints as



469 expected. There was a large range of angles recorded across the groups, especially following  
470 recovery with hyperactive movement, reducing the sensitivity of this approach for revealing  
471 significant differences between groups. However, this analysis corroborated the movement  
472 scores in revealing partial return to more normal joint position following short term  
473 immobilisation with the greatest effect on restoration of normal hip joint angles under both  
474 recovery regimens. In contrast the elbow joint remained most abnormally flexed under both  
475 recovery scenarios. This aligns well with the relative degree of recovery achieved in different  
476 joints.

477

478 Having established that embryonic motility partially resumes following short term  
479 immobilisation, we examined joint development, comparing the effects of both recovery  
480 scenarios to sustained absence of movement, and control specimens. Joint development is an  
481 important focus to assess the potential for recovery for two reasons: 1) the clinical relevance  
482 of joint developmental defects due to reduced fetal movement during pregnancy and 2)  
483 extensive characterisation of the effects of immobilisation on joint development in animal  
484 models, particularly the knee and hip joints in the chick (Bridglal et al., 2020; Sotiriou et al.,  
485 2019; Brunt et al., 2016; Nowlan et al., 2014; Roddy et al., 2011b; Nowlan et al., 2010a;  
486 Osborne et al., 2002). It was previously noted that chick elbow joints were affected similarly  
487 to knee joints (Roddy et al., 2011b) but here we describe elbow joint effects for the first time.  
488 To assess the potential for recovery upon resumption of movement we focussed on three  
489 aspects of joint developmental defects under immobilisation that could be readily scored on  
490 serial sections through the entire joint: 1) reduction in the joint interzone, scored as presence  
491 or absence of fusion between skeletal rudiments at the joint; 2) presence/absence of  
492 chondrogenous layers at rudiment termini; and 3) commencement of cavitation, denoted by  
493 tissue clearance. Using fusion between skeletal rudiments as a measure of the severity of effect  
494 showed some level of recovery following resumption of movement at all joints but most  
495 significantly at the hip and knee joints, particularly with hyperactivity induction post paralysis.  
496 It is important to note that absence of a fusion score indicates a less severe phenotype but does  
497 not necessarily indicate a normal interzone, where size might still be reduced. In previous  
498 studies 3D imaging was used to allow precise orientation, accommodating comparable  
499 measurements across immobilised and control specimens, showing reduction in the size of the  
500 interzone following immobilisation at the knee joint (Roddy et al., 2011b) and the hip (Bridglal  
501 et al., 2020). Here all specimens were analysed using serial histological sections so that all  
502 three aspects of joint development progression could be scored in each specimen. The difficulty



503 of ensuring that the orientation of physical sections is the same across specimens makes  
504 comparable measurements impossible. The fusion score however gives a reliable indicator of  
505 recovery.

506

507 Chondrogenous layers form at rudiment termini, at the knee joint at HH32, clearly recognisable  
508 in histological sections by increased cell density with cell alignment parallel to the joint line  
509 (Roddy et al., 2009). They give rise to the articular cartilage of the future joint (Ito and Kida,  
510 2000) and are molecularly distinct from the underlying transient cartilage that will be replaced  
511 by bone (Singh et al., 2018). Chondrogenous layers do not form in limb joints of both chick  
512 and mouse immobile embryos (Singh et al., 2018; Roddy et al., 2011b; Nowlan et al., 2010a;  
513 Kahn et al., 2009). Here we find that by far the best recovery in the appearance of  
514 chondrogenous layers is at the hip with hyperactivity (5/8 specimens compared to 0% at all  
515 joints examined under sustained immobilisation). Other joints, and all joints with natural  
516 resumption of movement, show limited recovery in small numbers of specimens. The third  
517 feature scored; initiation of cavitation at the joint, showed no indication of recovery in either  
518 the elbow or knee joint but is evident at the hip in three of eight specimens with hyperactivity  
519 treatment. Taking all three features together it is clear that the best recovery is seen at the hip  
520 joint with hyperactive movement, followed by the knee, with the elbow the least improved. It  
521 is interesting to note that the greatest improvement at the hip joint corresponds to resumption  
522 of a more natural angle in both recovery groups (Fig 2).

523

524 We have previously hypothesised that local biophysical stimuli generated from movement  
525 create a type of positional information that contributes to the correct patterning of emerging  
526 tissues in the joint (Roddy et al., 2011b). We have also shown changes in the molecular profiles  
527 and signalling pathways active across the territories of the joint (Shea et al., 2019; Rolfe et al.,  
528 2018; Singh et al., 2018; Rolfe et al., 2014). In particular, there is partitioning of signalling  
529 activity with BMP signalling active within the skeletal rudiment, at a distance from the joint  
530 interzone, and the canonical Wnt pathway active at the joint line, but this spatial restriction is  
531 lost in immobilised mouse and chick specimens (Rolfe et al., 2018; Singh et al., 2018). Cell  
532 territories are altered on multiple levels in immobilised specimens, also including localised cell  
533 proliferation patterns (Roddy et al., 2011b; Kahn et al., 2009; Germiller and Goldstein, 1997)  
534 and nuclear localisation patterns of YAP within skeletal rudiments, related to changes in shape  
535 at the joint interface (Shea et al., 2019). Cell migration is also an important feature of the  
536 forming joint (Shwartz et al., 2016) which may be another cellular activity affected by

537 biophysical stimuli (Rolfe et al., 2018), of particular interest given the importance of  
538 cytoskeletal regulation during cell migration. The partial recovery of cellular organisation seen  
539 here indicates that the molecular mechanisms that control localised tissue differentiation,  
540 sensitive to biophysical stimuli generated by movement, can recover if appropriate biophysical  
541 stimuli resume, even partially. In this study we have not assessed molecular profile, cell  
542 proliferation or cell migration under recovery, with the focus here on profiling overall recovery  
543 according to reliable morphological markers, but this will be important to address in future  
544 studies.

545

546 Reduced movement clearly impacts multiple aspects of joint development with multiple  
547 molecular and cellular changes sensitive to embryo movement. We assess recovery across  
548 multiple facets of joint development progression which are interrelated but distinct. Whereas  
549 we separately assess cellular organisation within the joint territory (reduction of the interzone  
550 and appearance of chondrogenous layers) and commencement of cavitation, some other studies  
551 use the term cavitation to encompass these multiple aspects of joint development. Osborne et  
552 al. (2002) devised a cavitation score which encompassed a spectrum of effects from full  
553 rudiment fusion to cavitated joints. Bridglal et al. (2020) assess the effects of a range of  
554 immobilisation regimens on hip joint development using 3D image analysis which does not  
555 assess the different cellular aspects detailed here, referring to observed reduction in rudiment  
556 separation as a cavitation effect. An important aspect of the Bridglal et al. (2020) study is the  
557 use of manual manipulation to move one immobilised limb, elegantly showing clear  
558 improvement in rudiment separation at the hip of the manipulated limb compared to the  
559 contralateral immobilised limb. It is interesting that we see best recovery in the hip. While  
560 Bridglal et al propose that movement causes physical weakness at the joint leading to  
561 cavitation, we propose that biophysical stimuli affect multiple aspects of cellular behaviour, at  
562 molecular, cell shape and cell migration levels. Specifically focusing on cavitation,  
563 Dowthwaite et al. (1998, 2003) show that hyaluronan synthesis and distribution plays an  
564 important role in cavitation; molecular components of the system are altered in immobilised  
565 embryos (Roddy et al., 2011b; Dowthwaite et al., 2003).

566

567 Recovery is not achieved in the spine with no difference observed with and without resumption  
568 of movement: all immobilised spines, including the recovery groups, were shorter and  
569 abnormally curved with the most common defect observed being lordosis and the thoracic  
570 region the least affected overall. The defects observed here are in agreement with previous

571 findings (Levillain et al., 2019; Rolfe et al., 2017) but extend the analysis by comparing  
572 deformity type, site and number following immobilisation, as well as examining the capacity  
573 for recovery. Hyper-kyphosis and hyper-lordosis were the most common defects observed with  
574 the cervical and lumbar regions the most affected. Congenital kyphosis can be caused by a  
575 failure of formation, or more commonly, a failure of segmentation of vertebrae, while  
576 congenital lordosis is caused by failure of posterior segmentation, or spinous process fusion  
577 (Lonstein, 1999). Posterior and anterior fusion of vertebrae was observed at curvature  
578 abnormalities in all immobilised groups, along the length of the spine (Data not shown), similar  
579 to earlier findings (Rolfe et al., 2017). The reduced impact on the thoracic region may be  
580 related to a stabilising effect of the ribs which have been shown to be independent of effects  
581 on thoracic vertebral shape or curvature associated with immobilisation (Levillain et al., 2019).  
582 The variability in recovery observed here, between the spine and the joints and indeed between  
583 different joints, brings important insight on the capacity for recovery and warrants further  
584 investigation to understand site-specific recovery better. The stark difference in recovery  
585 between spine and limb joints may be related to developmental timing differences. While  
586 formation of the sclerotome, from which the vertebrae emerge, begins at approximately E2.5  
587 with early cartilage cell differentiation by E5 and distinct segmented cartilaginous vertebrae by  
588 E6 (Scaal, 2016; Scaal and Christ, 2004; Shapiro, 1992), limb skeletogenesis occurs relatively  
589 later (Pacifci et al., 2006). The critical period of short-term immobilisation in this study (E4-  
590 E6) therefore corresponds to relatively later events in the spine including the appearance of  
591 distinct cartilaginous vertebrae. Relative timing might also explain why there is better recovery  
592 seen in the hip joint compared to more distal joints, particularly with respect to commencement  
593 of cavitation. Since cavitation is the latest of the features scored to appear during normal  
594 development, and since there is a proximo-distal gradient in developmental timing along the  
595 limb, it is possible that examination at a later stage would show better recovery in the more  
596 distal elbow and knee joints. Another important consideration in understanding the variability  
597 in recovery is the level and type of normal movement involved. While biometric studies *in*  
598 *utero* have profiled curvature changes of the developing human spine (Choufani et al., 2009)  
599 analysis of *in ovo* spinal movements has not been performed. Also while embryonic limb  
600 movement has been captured and modelled (Verbruggen et al., 2018a; Verbruggen et al.,  
601 2018b; Verbruggen et al., 2016; Nowlan et al., 2012; Roddy et al., 2011a; Roddy et al., 2011b;  
602 Nowlan et al., 2008), no such studies to date have modelled axial movements in order to  
603 understand their role in spine development. One contributing factor to superior recovery  
604 observed at the hip joint upon resumption of movement may be the impact of both limb and

605 body movements at the hip whereas distal limb joints are only impacted by isolated limb  
606 bending movements. Quantifying and separating the contribution of mechanical input from  
607 these sources would be of value to determine the contributory role they play in hip joint  
608 development. Incorporating technological advancements in movement analysis (Pollard et al.,  
609 2016) and alignment of individual embryo movements with recovery could further elucidate  
610 site-specific capacity for recovery.

611

612 The work presented here provides a detailed morphological description of response within the  
613 skeletal system to restoration of movement following a period of immobility. It is the first study  
614 to integrate analysis of the appendicular and axial skeleton providing insight into the  
615 differential plasticity of the skeletal system and potential for recovery. In particular it shows  
616 that multiple aspects of joint patterning, disturbed when mechanical stimulation is removed,  
617 can recover when movement resumes. Information from this research could inform clinical  
618 assessment of congenital conditions in which short periods of paralysis occur *in utero*.

619

## 620 **Materials and Methods**

### 621 **Egg incubation and *In ovo* movement manipulation**

622 Fertilised eggs (Ross 308, supplied by Allenwood Broiler Breeders), were incubated at 37.7°C  
623 in a humidified incubator. Work on chick embryos does not require a licence from the Irish  
624 Ministry of Health under European Legislation (Directive 2010/63/EU), all work on chick  
625 embryos was approved by the Trinity Ethics committee. Following 3 days of incubation, 5mls  
626 of albumen was removed from each egg using an 18-gauge needle. Immobilisation (rigid  
627 paralysis) treatments consisted of daily application of 100µl 0.5% Decamethonium bromide  
628 (DMB) (Sigma-Aldrich) in sterile Hank's Buffered Saline (HBSS) (Gibco) plus 1% antibiotic/  
629 antimycotic (aa) (Penicillin, streptomycin, amphotericin B; Sigma-Aldrich), dripped directly  
630 onto the vasculature of the chorioallantoic membrane through the "windowed" egg.

631

632 Sustained immobilisation with daily treatments from E4-E9, harvested at E10, was compared  
633 to post-paralysis recovery groups as follows: 1) Immobilisation (E4-E6) followed by natural  
634 recovery (E7-E10) designated Im + NR (natural recovery); 2) Immobilisation (E4-E6) followed  
635 by daily treatment with 0.2% 4-aminopyridine (4-AP; flurochem) in sterile HBSS plus aa,  
636 designated Im + HM (hyperactive movement), as represented in Figure 2. The experiment was  
637 repeated independently three times with between 3-14 replicate specimens per group per  
638 experiment.

639 Early and late treatment groups consisted of daily immobilisation from E4-E6, harvested at E7,  
640 or daily immobilisation at E7-E9, harvested at E10 respectively (Fig 1). Controls were treated  
641 with 100ul of sterile HBSS plus aa.

642

643 Harvesting was performed by cutting the vasculature surrounding the embryo and placing it in  
644 ice cold Phosphate Buffered Saline (PBS). Each embryo was staged using Hamburger and  
645 Hamilton criteria (Hamburger and Hamilton, 1992). Spines and limbs were dissected and either  
646 fixed in 4% paraformaldehyde (PFA) in PBS at 4°C, dehydrated through a graded series of  
647 ethanol (ETOH)/ PBS (25%, 50% 75%, 1x 10min washes, followed by 2x 10 min washes in  
648 100% ETOH) for wax embedding, or fixed in 95% ETOH for 48-72hrs for wholemount  
649 staining.

650

### 651 **Assessment of normal embryo movement during development**

652 Fertilised eggs were windowed at day 3 of incubation for *in ovo* observation (n=9) or  
653 transferred into culture for *ex ovo* observation (n=74), as previously described (Rolfe et al.,  
654 2018; Schomann et al., 2013), on days ranging from 3 to 6. The *ex-ovo* situation provides for  
655 better viewing and video recording of embryo movement while the *in ovo* samples allowed for  
656 comparison, with no differences noted between *ex-ovo* and *in-ovo* movement observations.  
657 Embryos were video recorded daily from E3-E6 using an 8-megapixel camera. The camera  
658 was placed in a fixed position above each embryo and videos of two minute duration were  
659 captured. Embryos were staged using morphological criteria according to Hamburger and  
660 Hamilton (Hamburger and Hamilton, 1951). The occurrence and types of movement observed  
661 in each video were recorded. Consecutive frame-by-frame stills of each movement were  
662 analysed using ImageJ software. Limb displacement was revealed by changes in forelimb  
663 position relative to landmarks on the head and trunk (eye, dorsal margin, dorsal aorta). During  
664 each observed limb movement, three still images 1-2 seconds apart, prior to, during and  
665 following a movement were overlaid, aligning at the dorsal aorta and aortic arch to capture the  
666 extent of limb displacement. Similar analysis of the hindlimb was hampered by less consistent  
667 visibility but similar movements of the hindlimb were evident.

668

### 669 **Movement scoring in embryos following a period of immobilisation and recovery**

670 Embryos were observed daily and movement or absence of movement noted during the  
671 treatment regimens (E4-E9); as expected immobilised specimens showed drastically reduced

672 movement. Movement scoring was carried out prior to harvest at E10 where each embryo was  
673 observed continually for 60 seconds and all movements recorded based on a simple  
674 classification scoring metric from 0 to 3; from a minimal value of 0= no body movements, 1=  
675 minor body sway, 2= some small limb movements and body sway, to the highest movement  
676 score of 3= large body movements and obvious bending of limbs. Replicate numbers for each  
677 group across experiments were as follows; control 'normal' movement n=23, sustained  
678 immobilisation n=14, immobilisation followed by natural movement n=14 and immobilisation  
679 followed by hyperactive movement n=25.

680

### 681 **Histological analysis**

682 One forelimb and one hindlimb from each specimen were processed for paraffin wax sectioning  
683 while the contralateral limbs were processed for whole limb analysis. A full series of  
684 longitudinal sections (8µm) were prepared through each entire limb. Sections were dewaxed  
685 and rehydrated, stained for cartilage with 0.025% alcian blue in 3% acetic acid (1 hour)  
686 followed by 1% picro-sirus red (1 hour) for collagen, or 0.1% Safranin-O (1 hour). Individual,  
687 entire limb joints were assessed for 1) separation (or continuity) of cartilaginous rudiments at  
688 the joint (fusion); 2) the presence of chondrogenous layers (region of future articular cartilage)  
689 at rudiment termini at the joint interface i.e. organised cell layers typified by increased cell  
690 density with cells aligned parallel to the joint interface (Singh et al., 2016; Mitrovic, 1977);  
691 and 3) the commencement of cavitation indicated by the appearance of a tissue free region  
692 within the joint. A full series of sections, from medial to lateral, was evaluated for each joint.  
693 Longitudinal sections (8µm) of spines from each movement group were processed as above to  
694 assess vertebral separation.

695

### 696 **Whole skeletal preparation and imaging**

697 Ethanol fixed whole limbs, and spines were stained for cartilage in 0.015% Alcian Blue in 95%  
698 Ethanol (in 20% glacial acetic acid) for 4–8 hours, followed by 0.01% Alizarin red in 1%  
699 Potassium Hydroxide (KOH) for bone and cleared in 1% Potassium Hydroxide (KOH) for 1–  
700 6 hours. Whole spines and limbs were aligned for lateral view and photographed using an  
701 Olympus DP72 camera and CellSens software (v1.6). Measurements were made from 2-  
702 dimensional images using ImageJ. Qualitative analysis of spinal curvature and spinal  
703 deformities was performed, and quantitative assessment of spine and rudiment length and joint  
704 angle were measured.



705

### 706 **Spine height and deformity quantification**

707 Spine length from cervical vertebra 1 (C1) to the last sacral vertebra was measured as a curved  
708 line through the centre of the vertebral bodies, from the most cranial to the most caudal, using  
709 the measurement function of ImageJ (v.1.51h).

710

711 To assess spinal curvature a line was traced along the centres of the vertebral bodies from the  
712 sagittal aspect to obtain an outline trace of sagittal curvature, as previously described (Rolfe et  
713 al., 2017). Sets of curvature outline traces were aligned at thoracic vertebra 1 (T1) and regions  
714 of pronounced kyphosis and lordosis were identified. Quantification of the number, type and  
715 sites of spinal deformities were assessed from whole stained spines from sagittal and coronal  
716 aspects. Replicate numbers for spine lengths and spinal deformities in each group were as  
717 follows; control ‘normal’ movement n=30, sustained immobilisation n=24, immobilisation  
718 followed by natural recovery n=22 and immobilisation followed by hyperactive movement  
719 n=20.

720

### 721 **Rudiment length and joint angle quantification**

722 Cartilage and bone stained images of limbs were used to measure rudiment length and joint  
723 angle. For rudiment length replicate numbers across immobilisation and control groups were  
724 between 16 and 26. Quantification of joint angles was performed in both the forelimb and  
725 hindlimb; elbow (both the humeroulnar and humeroradial), knee and hip. All joints were  
726 observed from the lateral aspect and straight lines drawn through the longitudinal mid-point of  
727 the ossification site (observed with Alizarin Red). For example, in the knee joint a straight line  
728 overlay was drawn along the midline length of the femur and another straight line overlay on  
729 the tibiotarsus. The angle where the lines intersect (the vertex), was measured (Fig. S2.).  
730 Replicate measurements for each joint across all groups were as follows; humeroulnar n=20-  
731 26, humeroradial n=19-24, knee joint n=15-23, hip joint n=10-18 (range represents the  
732 different experimental groups).

733

### 734 **Statistical analysis**

735 Statistical analysis was performed using SPSS (SPSS Statistics v26, IBM, corp.). To assess  
736 differences in movement scores, in mean joint angle, in spine lengths, in rudiment lengths, in  
737 joint defects, in the type and site of spinal deformities across and within experimental groups,  
738 univariate multiple comparisons analysis of variance (ANOVA) followed by Tukey *post-hoc*



739 tests were used. To assess spinal deformities and sites of deformities with immobilisation a  
740 multivariate ANOVA followed by Tukey *post-hoc* tests were used. For all comparisons  $p \leq 0.05$   
741 was considered statistically significant.

742

### 743 **Acknowledgements**

744 The authors are grateful to Dr. Claire Shea, Ms. Sarah Austin, Ms, Anna Shishparenok and  
745 Ms. Rachel Grant for their assistance with this research.

746

### 747 **Competing Interests**

748 All authors of this manuscript declare that they have no conflicts of interest to report. We  
749 confirm that all authors were fully involved in the study and preparation of the manuscript,  
750 and that the material within has not been submitted for publication elsewhere.

751

### 752 **Funding**

753 This work was supported by Trinity College Dublin.

754

### 755 **Author contributions**

756 Conception and design: R.A.R, P.M, Acquisition of Data: R.A.R., D.S.O'C. Analysis and  
757 interpretation of data: all authors. Writing the article: R.A.R, P.M. Final approval for  
758 publication: all authors.

759

### 760 **References**

761 **Bigi, N., Faure, J. M., Coubes, C., Puechberty, J., Lefort, G., Sarda, P. and**  
762 **Blanchet, P.** (2008). Prader-Willi syndrome: is there a recognizable fetal phenotype? *Prenat*  
763 *Diagn* **28**, 796-9.

764 **Bridglal, D. L., Boyle, C. J., Rolfe, R. A. and Nowlan, N. C.** (2020). Quantifying  
765 the tolerance of chick hip joint development to temporary paralysis and the potential for  
766 recovery. *Dev Dyn*.

767 **Brunt, L. H., Begg, K., Kague, E., Cross, S. and Hammond, C. L.** (2017). Wnt  
768 signalling controls the response to mechanical loading during Zebrafish joint development.  
769 *Development*.

770 **Brunt, L. H., Norton, J. L., Bright, J. A., Rayfield, E. J. and Hammond, C. L.**  
771 (2015). Finite element modelling predicts changes in joint shape and cell behaviour due to  
772 loss of muscle strain in jaw development. *J Biomech* **48**, 3112-22.

- 773 **Brunt, L. H., Skinner, R. E., Roddy, K. A., Araujo, N. M., Rayfield, E. J. and**  
774 **Hammond, C. L.** (2016). Differential effects of altered patterns of movement and strain on  
775 joint cell behaviour and skeletal morphogenesis. *Osteoarthritis Cartilage* **24**, 1940-1950.
- 776 **Choufani, E., Jouve, J. L., Pomeroy, V., Adalian, P., Chaumoitre, K. and Paniel,**  
777 **M.** (2009). Lumbosacral lordosis in fetal spine: genetic or mechanic parameter. *Eur Spine J*  
778 **18**, 1342-8.
- 779 **Donker, M. E., Eijkelhof, B. H., Tan, G. M. and de Vries, J. I.** (2009). Serial  
780 postural and motor assessment of Fetal Akinesia Deformation Sequence (FADS). *Early Hum*  
781 *Dev* **85**, 785-90.
- 782 **Dowthwaite, G. P., Edwards, J. C. and Pitsillides, A. A.** (1998). An essential role  
783 for the interaction between hyaluronan and hyaluronan binding proteins during joint  
784 development. *J Histochem Cytochem* **46**, 641-51.
- 785 **Dowthwaite, G. P., Flannery, C. R., Flannelly, J., Lewthwaite, J. C., Archer, C.**  
786 **W. and Pitsillides, A. A.** (2003). A mechanism underlying the movement requirement for  
787 synovial joint cavitation. *Matrix Biol* **22**, 311-22.
- 788 **Dutton, P. J., Warrander, L. K., Roberts, S. A., Bernatavicius, G., Byrd, L. M.,**  
789 **Gaze, D., Kroll, J., Jones, R. L., Sibley, C. P., Frøen, J. F. et al.** (2012). Predictors of poor  
790 perinatal outcome following maternal perception of reduced fetal movements--a prospective  
791 cohort study. *PLoS One* **7**, e39784.
- 792 **Felsenthal, N. and Zelzer, E.** (2017). Mechanical regulation of musculoskeletal  
793 system development. *Development* **144**, 4271-4283.
- 794 **Filges, I., Tercanli, S. and Hall, J. G.** (2019). Fetal arthrogryposis: Challenges and  
795 perspectives for prenatal detection and management. *Am J Med Genet C Semin Med Genet*  
796 **181**, 327-336.
- 797 **Fong, B. F. and De Vries, J. I.** (2003). Obstetric aspects of the Prader-Willi  
798 syndrome. *Ultrasound Obstet Gynecol* **21**, 389-92.
- 799 **Germiller, J. A. and Goldstein, S. A.** (1997). Structure and function of embryonic  
800 growth plate in the absence of functioning skeletal muscle. *J Orthop Res* **15**, 362-70.
- 801 **Hall, J. G.** (2014). Arthrogryposis (multiple congenital contractures): diagnostic  
802 approach to etiology, classification, genetics, and general principles. *Eur J Med Genet* **57**,  
803 464-72.
- 804 **Hamburger, V. and Balaban, M.** (1963). Observations and experiments on  
805 spontaneous rhythmical behavior in the chick embryo. *Dev Biol* **6**, 533-45.

- 806 **Hamburger, V. and Hamilton, H. L.** (1951). A series of normal stages in the  
807 development of the chick embryo. *J Morphol* **88**, 49-92.
- 808 **Hamburger, V. and Hamilton, H. L.** (1992). A series of normal stages in the  
809 development of the chick embryo. 1951. *Dev Dyn* **195**, 231-72.
- 810 **Heywood, J. L., McEntee, G. M. and Stickland, N. C.** (2005). In ovo  
811 neuromuscular stimulation alters the skeletal muscle phenotype of the chick. *J Muscle Res*  
812 *Cell Motil* **26**, 49-56.
- 813 **Hosseini, A. and Hogg, D. A.** (1991). The effects of paralysis on skeletal  
814 development in the chick embryo. I. General effects. *J Anat* **177**, 159-68.
- 815 **Ito, M. M. and Kida, M. Y.** (2000). Morphological and biochemical re-evaluation of  
816 the process of cavitation in the rat knee joint: cellular and cell strata alterations in the  
817 interzone. *J Anat* **197 Pt 4**, 659-79.
- 818 **Kahn, J., Shwartz, Y., Blitz, E., Krief, S., Sharir, A., Breitel, D. A., Rattenbach,**  
819 **R., Relaix, F., Maire, P., Rountree, R. B. et al.** (2009). Muscle contraction is necessary to  
820 maintain joint progenitor cell fate. *Dev Cell* **16**, 734-43.
- 821 **Kardon, G.** (1998). Muscle and tendon morphogenesis in the avian hind limb.  
822 *Development* **125**, 4019-32.
- 823 **Kowalczyk, B. and Felus, J.** (2016). Arthrogyrosis: an update on clinical aspects,  
824 etiology, and treatment strategies. *Arch Med Sci* **12**, 10-24.
- 825 **Lai, J., Nowlan, N., Vaidyanathan, R., Shaw, C. J. and Lees, C. C.** (2016). Fetal  
826 movements as a predictor of health. *Acta Obstet Gynecol Scand*.
- 827 **Levillain, A., Rolfe, R. A., Huang, Y., Iatridis, J. C. and Nowlan, N. C.** (2019).  
828 Short-term foetal immobility temporally and progressively affects chick spinal curvature and  
829 anatomy and rib development. *Eur Cell Mater* **37**, 23-41.
- 830 **Lonstein, J. E.** (1999). Congenital spine deformities: scoliosis, kyphosis, and  
831 lordosis. *Orthop Clin North Am* **30**, 387-405, viii.
- 832 **Ma, L. and Yu, X.** (2017). Arthrogyrosis multiplex congenita: classification,  
833 diagnosis, perioperative care, and anesthesia. *Front Med* **11**, 48-52.
- 834 **Miller, M. E. and Hangartner, T. N.** (1999). Temporary brittle bone disease:  
835 association with decreased fetal movement and osteopenia. *Calcif Tissue Int* **64**, 137-43.
- 836 **Mitrovic, D. R.** (1977). Development of the metatarsophalangeal joint of the chick  
837 embryo: morphological, ultrastructural and histochemical studies. *Am J Anat* **150**, 333-47.
- 838 **Moessinger, A. C.** (1983). Fetal akinesia deformation sequence: an animal model.  
839 *Pediatrics* **72**, 857-63.

- 840 **Nowlan, N. C.** (2015). Biomechanics of foetal movement. *Eur Cell Mater* **29**, 1-21;  
841 discussion 21.
- 842 **Nowlan, N. C., Bourdon, C., Dumas, G., Tajbakhsh, S., Prendergast, P. J. and**  
843 **Murphy, P.** (2010a). Developing bones are differentially affected by compromised skeletal  
844 muscle formation. *Bone* **46**, 1275-85.
- 845 **Nowlan, N. C., Chandaria, V. and Sharpe, J.** (2014). Immobilized chicks as a  
846 model system for early-onset developmental dysplasia of the hip. *J Orthop Res* **32**, 777-85.
- 847 **Nowlan, N. C., Dumas, G., Tajbakhsh, S., Prendergast, P. J. and Murphy, P.**  
848 (2012). Biophysical stimuli induced by passive movements compensate for lack of skeletal  
849 muscle during embryonic skeletogenesis. *Biomech Model Mechanobiol* **11**, 207-19.
- 850 **Nowlan, N. C., Prendergast, P. J. and Murphy, P.** (2008). Identification of  
851 mechanosensitive genes during embryonic bone formation. *PLoS Comput Biol* **4**, e1000250.
- 852 **Nowlan, N. C., Sharpe, J., Roddy, K. A., Prendergast, P. J. and Murphy, P.**  
853 (2010b). Mechanobiology of embryonic skeletal development: Insights from animal models.  
854 *Birth Defects Res C Embryo Today* **90**, 203-13.
- 855 **Oppenheim, R. W.** (1975). The role of supraspinal input in embryonic motility: a re-  
856 examination in the chick. *J Comp Neurol* **160**, 37-50.
- 857 **Osborne, A. C., Lamb, K. J., Lewthwaite, J. C., Dowthwaite, G. P. and**  
858 **Pitsillides, A. A.** (2002). Short-term rigid and flaccid paralyse diminish growth of  
859 embryonic chick limbs and abrogate joint cavity formation but differentially preserve pre-  
860 cavitated joints. *J Musculoskelet Neuronal Interact* **2**, 448-56.
- 861 **Pacifici, M., Koyama, E., Shibukawa, Y., Wu, C., Tamamura, Y., Enomoto-**  
862 **Iwamoto, M. and Iwamoto, M.** (2006). Cellular and molecular mechanisms of synovial  
863 joint and articular cartilage formation. *Ann NY Acad Sci* **1068**, 74-86.
- 864 **Pan, X. S., Li, J., Brown, E. B. and Kuo, C. K.** (2018). Embryo movements regulate  
865 tendon mechanical property development. *Philos Trans R Soc Lond B Biol Sci* **373**.
- 866 **Pitsillides, A. A.** (2006). Early effects of embryonic movement: 'a shot out of the  
867 dark'. *J Anat* **208**, 417-31.
- 868 **Pollard, A. S., Boyd, S., McGonnell, I. M. and Pitsillides, A. A.** (2017). The role of  
869 embryo movement in the development of the furcula. *J Anat* **230**, 435-443.
- 870 **Pollard, A. S., Pitsillides, A. A. and Portugal, S. J.** (2016). Validating a  
871 Noninvasive Technique for Monitoring Embryo Movement In Ovo. *Physiol Biochem Zool*  
872 **89**, 331-9.

- 873           **Roddy, K. A., Kelly, G. M., van Es, M. H., Murphy, P. and Prendergast, P. J.**  
874 (2011a). Dynamic patterns of mechanical stimulation co-localise with growth and cell  
875 proliferation during morphogenesis in the avian embryonic knee joint. *J Biomech.*
- 876           **Roddy, K. A., Nowlan, N. C., Prendergast, P. J. and Murphy, P.** (2009). 3D  
877 representation of the developing chick knee joint: a novel approach integrating multiple  
878 components. *J Anat* **214**, 374-87.
- 879           **Roddy, K. A., Prendergast, P. J. and Murphy, P.** (2011b). Mechanical influences  
880 on morphogenesis of the knee joint revealed through morphological, molecular and  
881 computational analysis of immobilised embryos. *PLoS One* **6**, e17526.
- 882           **Rolfe, R. A., Bezer, J. H., Kim, T., Zaidon, A. Z., Oyen, M. L., Iatridis, J. C. and**  
883 **Nowlan, N. C.** (2017). Abnormal fetal muscle forces result in defects in spinal curvature and  
884 alterations in vertebral segmentation and shape. *J Orthop Res.*
- 885           **Rolfe, R. A., Nowlan, N. C., Kenny, E. M., Cormican, P., Morris, D. W.,**  
886 **Prendergast, P. J., Kelly, D. and Murphy, P.** (2014). Identification of mechanosensitive  
887 genes during skeletal development: alteration of genes associated with cytoskeletal  
888 rearrangement and cell signalling pathways. *BMC Genomics* **15**, 48.
- 889           **Rolfe, R. A., Shea, C. A., Singh, P. N. P., Bandyopadhyay, A. and Murphy, P.**  
890 (2018). Investigating the mechanistic basis of biomechanical input controlling skeletal  
891 development: exploring the interplay with Wnt signalling at the joint. *Philos Trans R Soc*  
892 *Lond B Biol Sci* **373**.
- 893           **Scaal, M.** (2016). Early development of the vertebral column. *Semin Cell Dev Biol*  
894 **49**, 83-91.
- 895           **Scaal, M. and Christ, B.** (2004). Formation and differentiation of the avian  
896 dermomyotome. *Anat Embryol (Berl)* **208**, 411-24.
- 897           **Schomann, T., Qunneis, F., Widera, D., Kaltschmidt, C. and Kaltschmidt, B.**  
898 (2013). Improved method for ex ovo-cultivation of developing chicken embryos for human  
899 stem cell xenografts. *Stem Cells Int* **2013**, 960958.
- 900           **Shapiro, F.** (1992). Vertebral development of the chick embryo during days 3-19 of  
901 incubation. *J Morphol* **213**, 317-33.
- 902           **Shea, C. A., Rolfe, R. A., McNeill, H. and Murphy, P.** (2019). Localization of YAP  
903 activity in developing skeletal rudiments is responsive to mechanical stimulation. *Dev Dyn.*
- 904           **Shea, C. A., Rolfe, R. A. and Murphy, P.** (2015). The importance of foetal  
905 movement for co-ordinated cartilage and bone development in utero : clinical consequences  
906 and potential for therapy. *Bone Joint Res* **4**, 105-16.

- 907 **Shwartz, Y., Viukov, S., Krief, S. and Zelzer, E.** (2016). Joint Development  
908 Involves a Continuous Influx of Gdf5-Positive Cells. *Cell Rep* **15**, 2577-87.
- 909 **Singh, P. N., Ray, A., Azad, K. and Bandyopadhyay, A.** (2016). A comprehensive  
910 mRNA expression analysis of developing chicken articular cartilage. *Gene Expr Patterns* **20**,  
911 22-31.
- 912 **Singh, P. N. P., Shea, C., Sonker, S. K., Rolfe, R., Ray, A., Kumar, S., Gupta, P.,**  
913 **Murphy, P. and Bandyopadhyay, A.** (2018). Precise spatial restriction of BMP signaling in  
914 developing joints is perturbed upon loss of embryo movement. *Development*.
- 915 **Skaria, P., Dahl, A. and Ahmed, A.** (2019). Arthrogyrosis multiplex congenita in  
916 utero: radiologic and pathologic findings. *J Matern Fetal Neonatal Med* **32**, 502-511.
- 917 **Sotiriou, V., Rolfe, R. A., Murphy, P. and Nowlan, N. C.** (2019). Effects of  
918 Abnormal Muscle Forces on Prenatal Joint Morphogenesis in Mice. *J Orthop Res*.
- 919 **Vaquero-Picado, A., González-Morán, G., Garay, E. G. and Moraleda, L.** (2019).  
920 Developmental dysplasia of the hip: update of management. *EFORT Open Rev* **4**, 548-556.
- 921 **Verbruggen, S. W., Kainz, B., Shelmerdine, S. C., Arthurs, O. J., Hajnal, J. V.,**  
922 **Rutherford, M. A., Phillips, A. T. M. and Nowlan, N. C.** (2018a). Altered biomechanical  
923 stimulation of the developing hip joint in presence of hip dysplasia risk factors. *J Biomech*  
924 **78**, 1-9.
- 925 **Verbruggen, S. W., Kainz, B., Shelmerdine, S. C., Hajnal, J. V., Rutherford, M.**  
926 **A., Arthurs, O. J., Phillips, A. T. M. and Nowlan, N. C.** (2018b). Stresses and strains on  
927 the human fetal skeleton during development. *J R Soc Interface* **15**.
- 928 **Verbruggen, S. W., Loo, J. H., Hayat, T. T., Hajnal, J. V., Rutherford, M. A.,**  
929 **Phillips, A. T. and Nowlan, N. C.** (2016). Modeling the biomechanics of fetal movements.  
930 *Biomech Model Mechanobiol* **15**, 995-1004.
- 931 **Wu, K. C., Streicher, J., Lee, M. L., Hall, B. K. and Müller, G. B.** (2001). Role of  
932 motility in embryonic development I: Embryo movements and amnion contractions in the  
933 chick and the influence of illumination. *J Exp Zool* **291**, 186-94.

934  
935  
936  
937  
938  
939



940 **Tables**

941 Table 1: The onset of embryo movement during chick development from E4-E6; precise HH  
 942 stages noted. Analysis of two-minute video recordings of each specimen, recording body  
 943 movement and limb displacement. Column 5 shows example analysis (2 examples for each  
 944 stage) where the dorsal aorta and aortic arch (a/aa) (black arrowhead) were overlaid and the  
 945 limb outlined in successive still images 1-2 seconds apart; Green = initial position, blue=  
 946 moved, orange = final position. Fl; forelimb, 1mm scale bar for each.  
 947

| Stage   | No of embryos | Embryonic day         | Movement                                          | Overlay image analysis of forelimb displacement (2 independent examples/stage) |
|---------|---------------|-----------------------|---------------------------------------------------|--------------------------------------------------------------------------------|
| HH17-19 | 6             | E4                    | No movement                                       |                                                                                |
| HH20    | 7             | E4                    | No movement                                       |                                                                                |
| HH21    | 4             | E4                    | No movement                                       |                                                                                |
| HH22    | 11            | E4<br>(10 E4, 1 E5)   | 8/11 some body movement                           |                                                                                |
| HH23    | 11            | E4<br>(8 E4, 3 E5)    | 9/11 body movement;<br>8/11 limb displacement     |                                                                                |
| HH24    | 4             | E5<br>(3 E5, 1 E4)    | 4/4 body movement<br>4/4 limb displacement        |                                                                                |
| HH25    | 15            | E5<br>(14 E5, 1 E6)   | 15/15 body movement<br>15/15 limb displacement    |                                                                                |
| HH26    | 5             | E5/E6<br>(2 E5, 3 E6) | 5/5 body movement<br>5/5 limb displacement        |                                                                                |
| HH27-29 | 16            | E6                    | 16/16 body movement<br>16/16 large limb movements |                                                                                |

948  
 949  
 950



951 Table 2: Mean joint angles (+/- SEM) observed at the elbow, knee and hip in each group at  
952 E10. Numbers of replicates (n) indicated. Represented graphically and significance levels  
953 indicated in Fig. 2C and D.

| Joint       | Control           | Sustained Immobilisation | Im + NR          | Im + HM          |
|-------------|-------------------|--------------------------|------------------|------------------|
| Humeroulnar | 88.8° ±3° n=26    | 59.7° ±4.1° n=20         | 59.7° ±3.6° n=23 | 62.6° ±4.9° n=20 |
| Knee        | 110.2° ±3.2° n=23 | 93.7° ±3° n=18           | 97.2° ±4.7° n=19 | 87° ±4.4° n=15   |
| Hip         | 86° ±1.2° n=15    | 77.7° ±2.3° n=15         | 80° ±2.1° n=18   | 87.9° ±1.6° n=10 |

954

955

956

957

958

959

960

961

962

963

964

965

966

967

968

969

970

971

972

973

974

975

976

977

978

979

980

981

982

983

984

985

986

987

988

989

990

991

992

993

994 Table 3: No. of specimens showing features of immobilisation at the elbow, knee and hip joints  
 995 in control specimens (normal movement), following sustained immobilisation, and following  
 996 recovery periods post-immobilisation; Natural Recovery (Im + NR) and Hyperactive  
 997 Movement (Im + HM), as indicated. Colour of asterisks indicates the group comparison to  
 998 which the significance level assessment relates, Black \* to normal movement, Red \* to  
 999 sustained, Green \* to Im+NR. \*, p≤0.05, \*\*, p≤0.01, \*\*\*, p≤0.001.

|                                  | <b>Normal<br/>movement</b> | <b>Sustained<br/>Immobilisation</b> | <b>Im + NR</b>     | <b>Im + HM</b>          |
|----------------------------------|----------------------------|-------------------------------------|--------------------|-------------------------|
| <b>Humeroradial joint</b>        |                            |                                     |                    |                         |
| Rudiment fusion at joint         | 0/8 (0%)                   | 8/8 *** (100%)                      | 6/12 ** / ** (50%) | 10/11 *** / * (91%)     |
| Commencement of cavitation       | 8/8 (100%)                 | 0/8 *** (0%)                        | 0/12 *** (0%)      | 0/11 *** (0%)           |
| Presence of chondrogenous layers | 8/8 (100%)                 | 0/8 *** (0%)                        | 2/12 *** (17%)     | 1/11 *** (9%)           |
| <b>Humeroulnar joint</b>         |                            |                                     |                    |                         |
| Rudiment fusion at joint         | 0/8 (0%)                   | 5/9 (56%)                           | 3/12 (25%)         | 2/11 (18%)              |
| Commencement of cavitation       | 8/8 (100%)                 | 1/9 *** (11%)                       | 0/12 *** (0%)      | 0/11 *** (0%)           |
| Presence of chondrogenous layers | 8/8 (100%)                 | 0/9 *** (0%)                        | 4/12 ** (33%)      | 2/11 *** (18%)          |
| <b>Knee Joint</b>                |                            |                                     |                    |                         |
| Rudiment fusion at joint         | 0/7 (0%)                   | 7/8 ** (88%)                        | 7/11 ** (64%)      | 1/8 ** / * (12.5%)      |
| Commencement of cavitation       | 7/7 (100%)                 | 0/8 *** (0%)                        | 0/11 *** (0%)      | 0/8 *** (0%)            |
| Presence of chondrogenous layers | 7/7 (100%)                 | 0/8 *** (0%)                        | 2/11 *** (18%)     | 2/8 ** (25%)            |
| <b>Hip Joint</b>                 |                            |                                     |                    |                         |
| Rudiment fusion at joint         | 0/7 (0%)                   | 6/6 ** (100%)                       | 5/7 ** (71%)       | 1/8 * / * (12.5%)       |
| Commencement of cavitation       | 7/7 (100%)                 | 0/6 *** (0%)                        | 1/7 *** (14%)      | 3/8 ** (37.5%)          |
| Presence of chondrogenous layers | 7/7 (100%)                 | 0/6 *** (0%)                        | 0/7 *** (0%)       | 5/8 * / ** / ** (62.5%) |

1000

1001

1002 **Figure legends**

1003 **Figure 1: Both early and late immobilisation of chick embryos *in ovo* result in abnormal**  
1004 **development of knee and hip joints.**

1005 (A) Schematic of chick embryo immobilisation regimens  
1006 using daily dosing for three consecutive days with 0.5% Decamethonium Bromide (DMB) as  
1007 indicated by red arrows. Early; from day 4 to day 6; and later from day 7 to day 9. Specimens  
1008 were harvested at E (embryonic day)7 (HH30), or E10 (HH36), respectively (each specimen  
1009 staged). (B) Histological sections of knee and hip joints from early (i) and later (ii)  
1010 immobilisation regimes as indicated. Representative replicate immobilised specimens are  
1011 shown compared to control (b and c, e and f, h and i, k and j show replicate specimens). a-c, e-  
1012 l are stained with alcian blue; d stained with Safranin-O. Dotted lines overlaid on the HH30  
1013 images outline the cartilage rudiments showing altered rudiment separation with  
1014 immobilisation. Yellow arrows in HH36 indicate the initiation of cavitation in control knee and  
1015 hip joints, absent with immobilisation. fe; femur, tib; tibiotarsus, il; ilium. Scale bar 100µm.

1016 **Figure 2: Embryonic movement resumes when early immobilisation (E4-E6) is followed**  
1017 **by a natural recovery period (E7-E10; Im+NR) or induction of hyperactivity (4AP**  
1018 **treatment; E7-E10; Im+HM).**

1019 (A) Schematic of chick embryo immobilisation regimens using  
1020 daily dosing with 0.5% Decamethonium Bromide (DMB) as indicated by red arrows  
1021 commencing at day 4 of incubation; harvesting was at E10 under all regimens. Sustained  
1022 immobilisation (red), treatment for 6 consecutive days; Immobilisation + NR (natural recovery)  
1023 (green), treatment E4-E6; Immobilisation + HM (hyperactive movement treatment) (blue),  
1024 treatment E4-E6 followed by addition of 0.2% 4-Aminopyridine (4-AP; blue arrows) on day 7  
1025 for 3 consecutive days. (B) Movement scores as indicated following observation of each  
1026 embryo at E10 for 1 min periods (n=14-26 per group). Percentage of movements with scores  
1027 0-3 observed in each treatment group are shown. (C) Visual representation using schematic  
1028 outline drawings for forelimb and hindlimb rudiments and joints, as labelled, with coloured  
1029 lines indicating the mean joint angle for each group and the coloured segment overlay showing  
1030 the angle range observed for each immobilisation regimen (Table 2). (D) Dot plots of joint  
1031 angle including statistical analyses indicating the individual angles observed for each joint  
1032 across groups. **Black** lines, **Grey** slices and dots; control 'normal' movement, **Red** lines, slices  
1033 and dots; Sustained immobilisation (E4-E10), **Green** lines, slices and dots; Immobilisation  
1034 (E4-E6) + natural recovery (E7-E10), **Blue** lines, slices and dots; Immobilisation (E4-E6) +  
1035 hyperactive movement (E7-E10).\*;p≤0.05,\*\*;p≤0.01, \*\*\*;p≤0.001.

1036 **Figure 3: Elbow, knee and hip joint tissue patterning and morphogenesis are disrupted**  
1037 **with sustained immobilisation, while movement resumption leads to partial recovery in**  
1038 **aspects of joint organisation**, as revealed by histological analysis. All joints were examined  
1039 by longitudinal serial sections from medial to lateral of each specimen (n values indicated;  
1040 representative images shown). Schematic outline drawings (row i) represent individual  
1041 specimens from each experimental group as indicated (sections shown in row ii), through the  
1042 elbow (A) knee (B) and Hip (C) joints. Row i: Red open brackets indicate normal rudiment  
1043 separation/ interzone; red dotted lines indicate rudiment fusion (absence of interzone). The  
1044 proportions of specimens with rudiment fusion observed across the groups is indicated. Row  
1045 ii: histological sections as outlined in row i, indicating also the commencement of cavitation  
1046 where visible (black arrow); numbers indicate number of specimens in each category where  
1047 cavity commencement was observed. Row iii: chondrogenous layers, where present, are  
1048 outlined in yellow dash; numbers indicate number of specimens in each category where  
1049 chondrogenous layers (cl) are distinguishable. Abbreviations: HRD; Humeroradial, HUL;  
1050 humeroulnar, h; humerus, rd; radius, ul; ulna, fe; femur, tib; tibiotalarsus, Mfc; medial femoral  
1051 condyle. All scale bars 1000µm.

1052

1053 **Figure 4: Spines from immobilised specimens with and without resumption of movement**  
1054 **were shorter and abnormally curved compared to spines with normal movement.** (A)  
1055 Comparison of spine lengths in all movement groups \*\*\* $p \leq 0.001$ , (B) Sagittal curvature  
1056 outlines of control (grey), sustained immobilisation (red) and immobilisation followed by  
1057 natural recovery (NR) of movement (green) or hyperactive movement (HM) (blue lines) show  
1058 reduction in lengths and curvature abnormalities. Individual spines overlaid at thoracic vertebra  
1059 1 (T1). Scale bar 1cm. replicate numbers indicated.

1060

1061 **Figure 5: The cervical and lumbar regions are most highly affected by curvature**  
1062 **deformities, hyperlordosis and hyperkyphosis, under immobilisation.** (A) Schematic  
1063 outlines of normal sagittal spinal curvature and the spinal deformities (X) of lordosis, kyphosis  
1064 and scoliosis. (B) Average number of curvature defects observed in each reduced movement  
1065 group. (C) Bar chart showing the number and type of spinal defects observed in each  
1066 anatomical region (cervical, thoracic, lumbar and sacral) for all reduced movement groups. (D)  
1067 Bar chart indicating the anatomical regions that are most affected by immobilisation \*;  $p \leq 0.05$ ,  
1068 \*\*;  $p \leq 0.01$ , \*\*\*;  $p \leq 0.001$ .

1069

**A** **0.5% DMB (Decamethonium bromide)**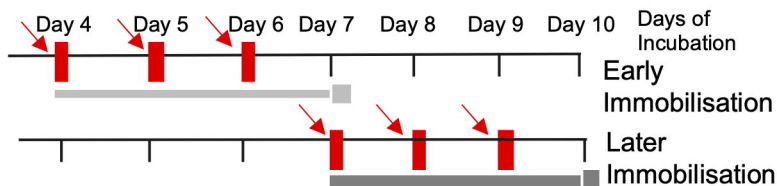**Bi** Control Early Immobilised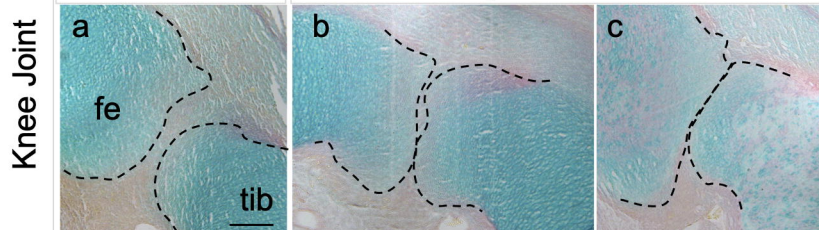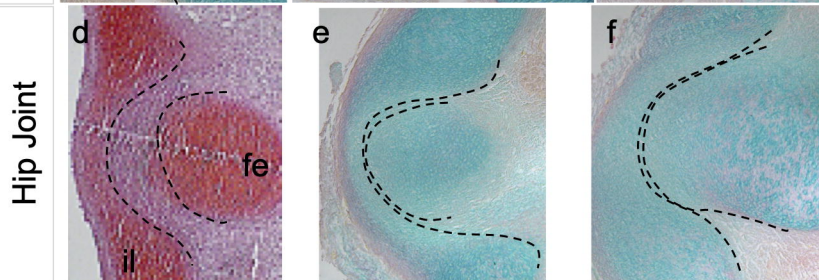**Bii** Control Later Immobilised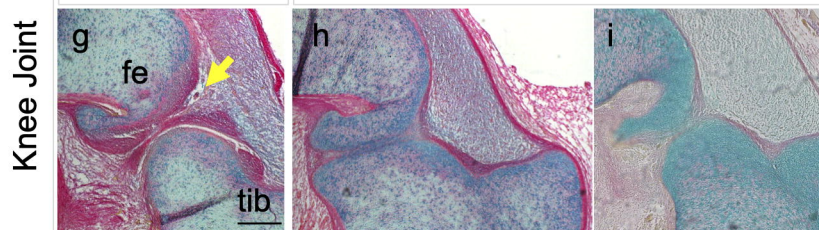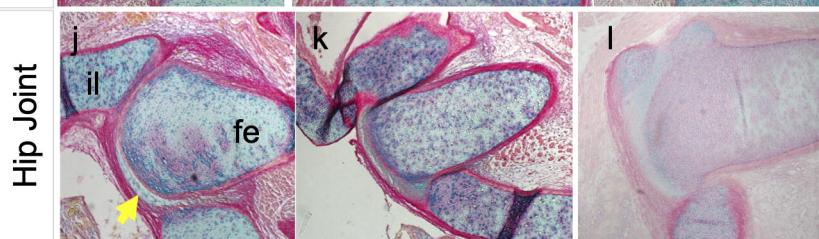



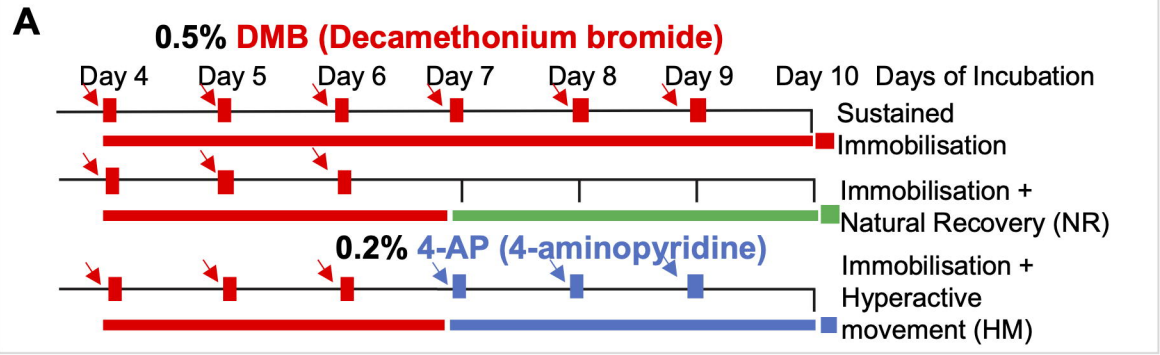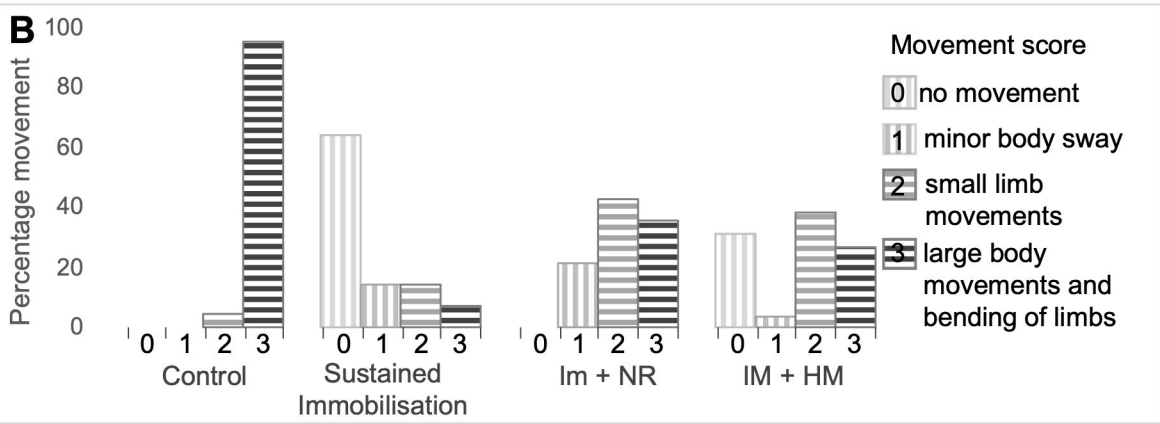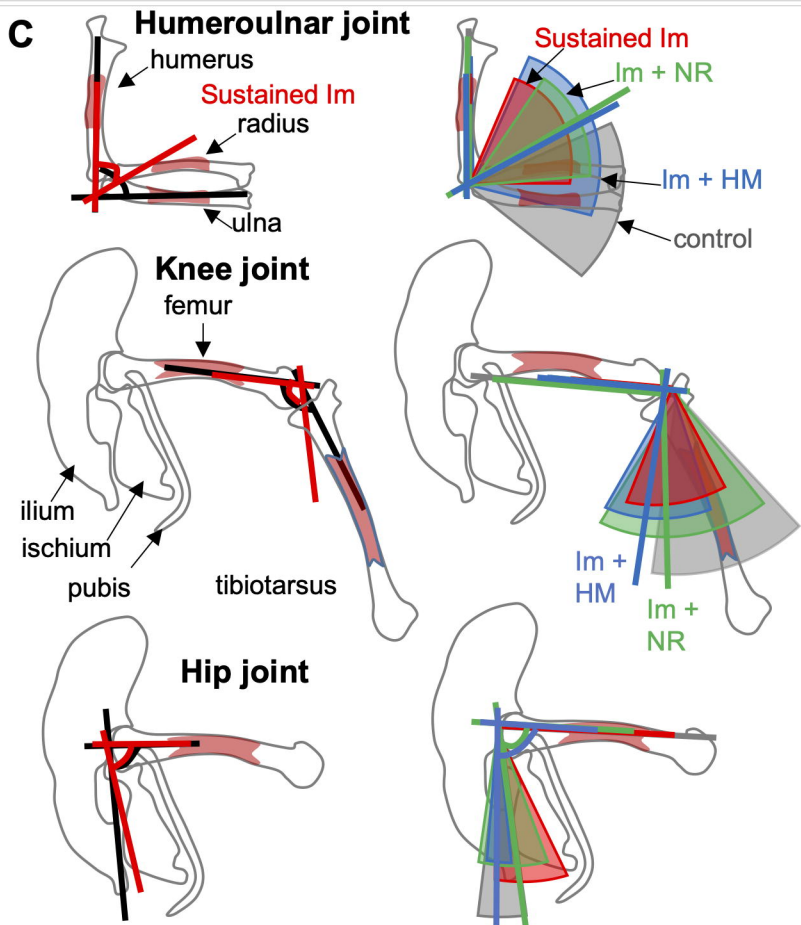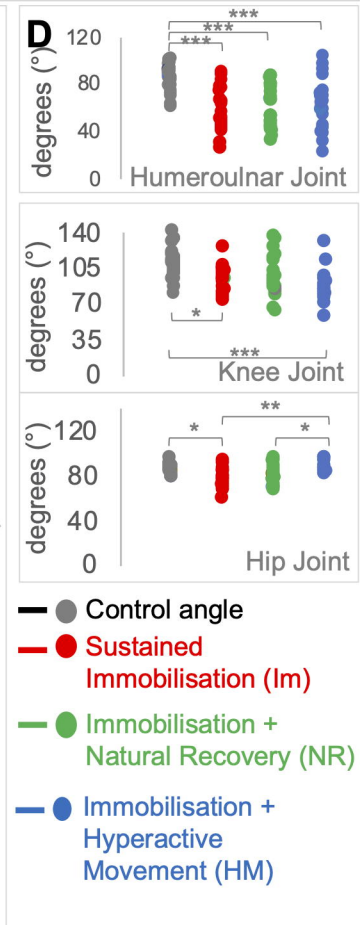



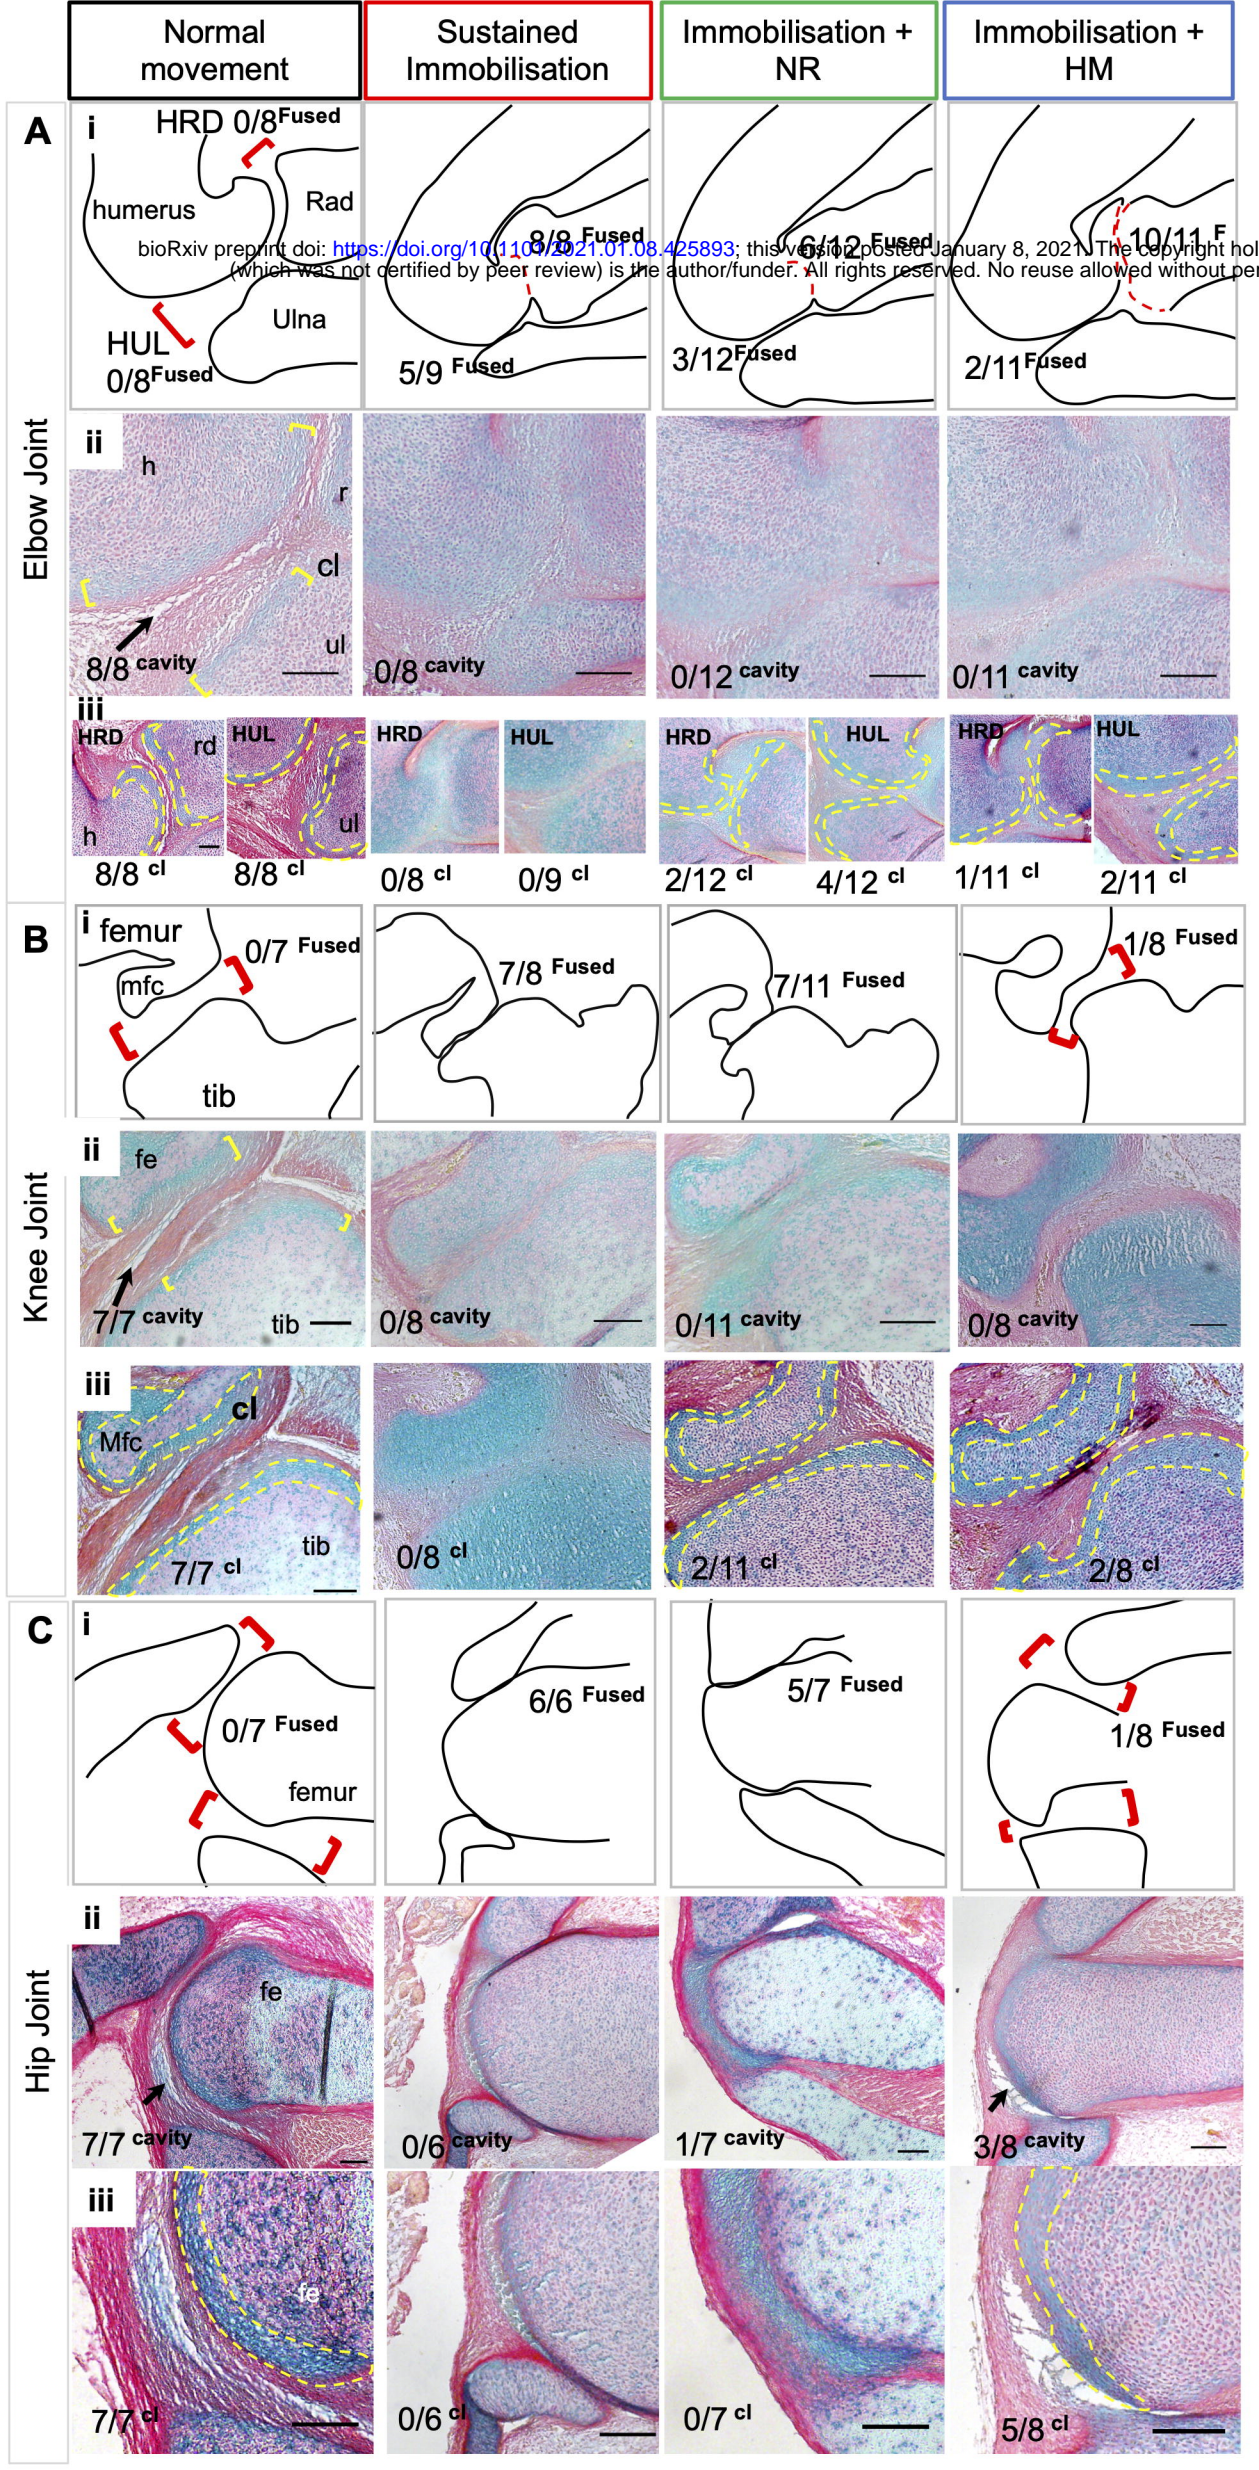



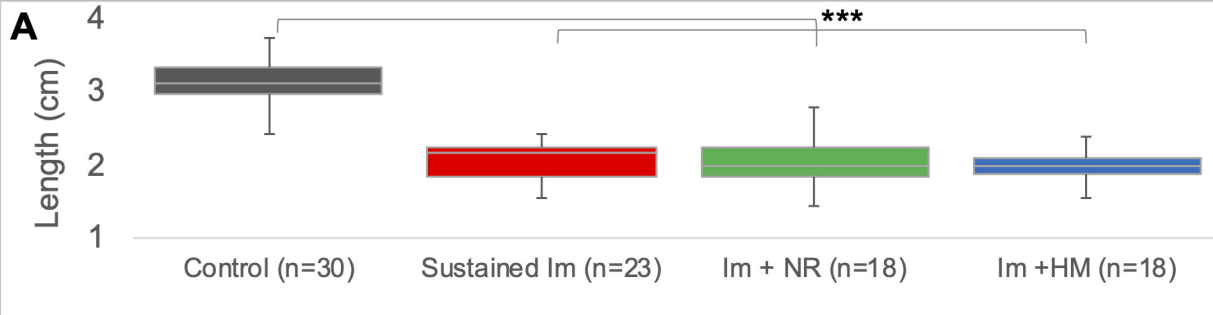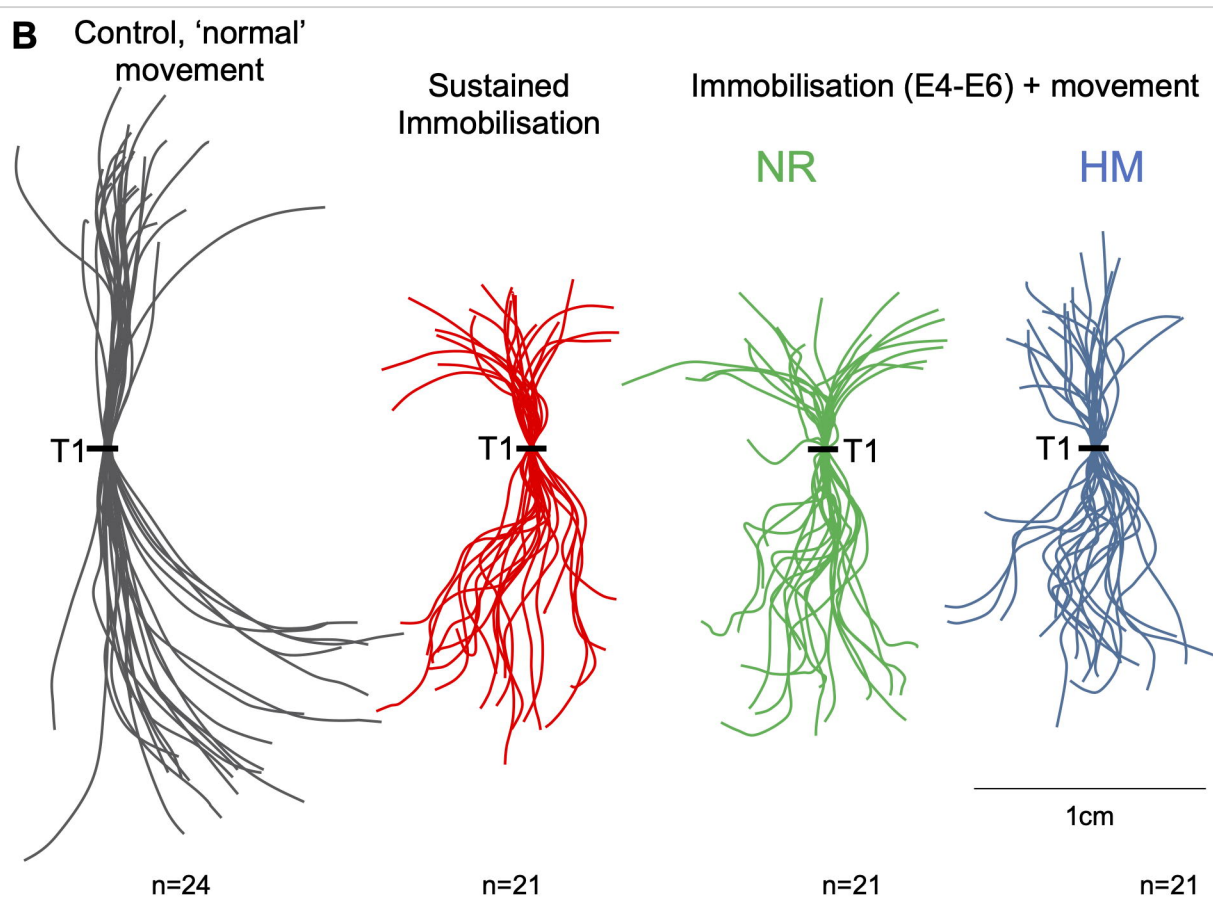

**A**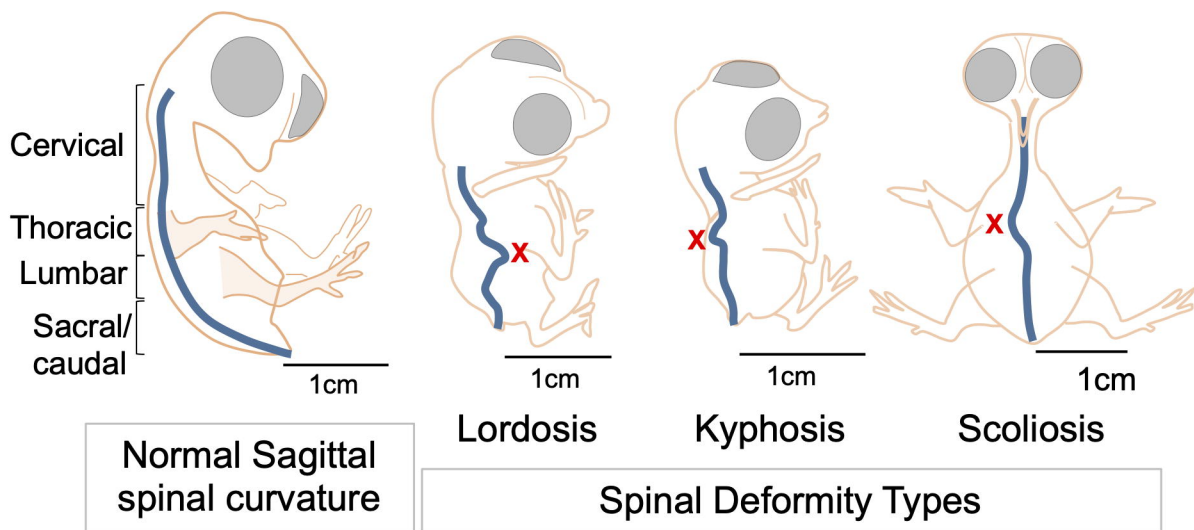**B**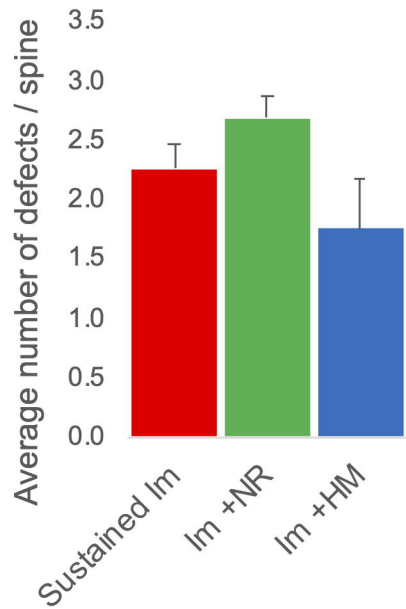**C**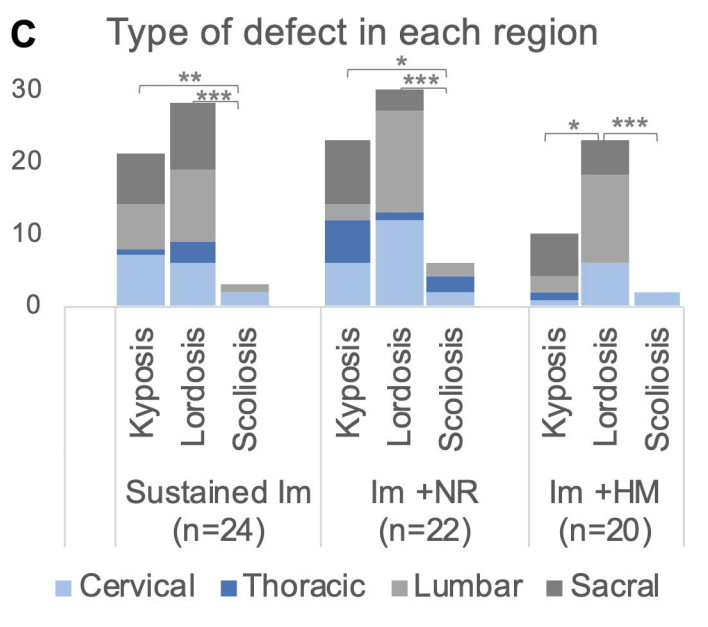**D**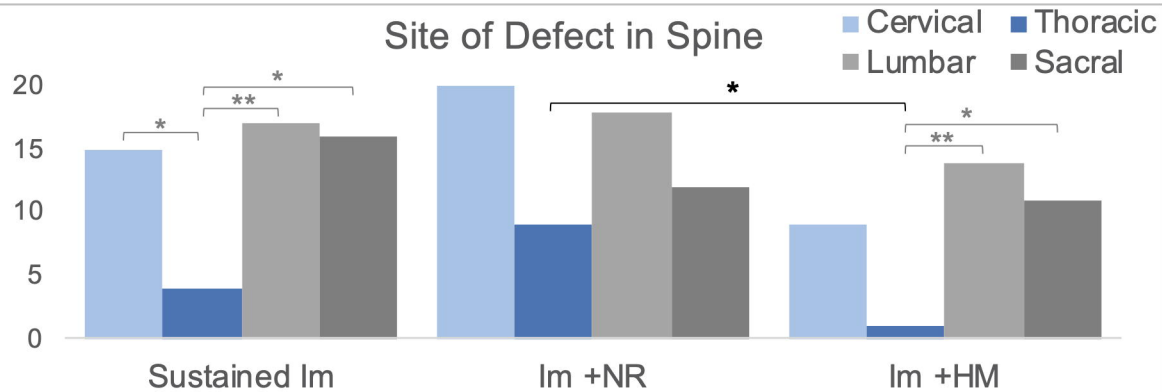

Source: https://www.biorxiv.org/content/10.1101/2021.01.08.425893v1.full.pdf
